# Supplementary material for: Pyrene-tagged carbohydrate-based mixed P/S ligand: spacer effect on the Rh(i)-catalyzed hydrogenation of methyl α-acetamidocinnamate
Source: Royal Society of Chemistry journal article supplement (doi:10.1039/c7ob01085k), 2017-01-01

**Electronic Supporting Information of the paper:  
“Pyrene-Tagged Carbohydrate-based Mixed P/S  
Ligand: Spacer effect on the Rh(I)-catalyzed  
Hydrogenation of Methyl  $\alpha$ -Acetamido Cinnamate”.**

By: Juan Francisco Moya,<sup>a</sup> Christian Rosales,<sup>a</sup> Inmaculada Fernández,<sup>b</sup> Nouredine Khier.\*<sup>a</sup>

<sup>a</sup>*Instituto de Investigaciones Químicas, C.S.I.C-Universidad de Sevilla, c/. Américo Vespucio, 49., Isla de la Cartuja, 41092 Sevilla, Spain. Fax:+34954460565; Tel: +34954489559; E-mail: [khier@iiq.csic.es](mailto:khier@iiq.csic.es)*

<sup>b</sup>*Departamento de Química Orgánica y Farmacéutica, Facultad de Farmacia, Universidad de Sevilla, 41012 Sevilla, Spain; E-mail: [inmaff@us.es](mailto:inmaff@us.es)*

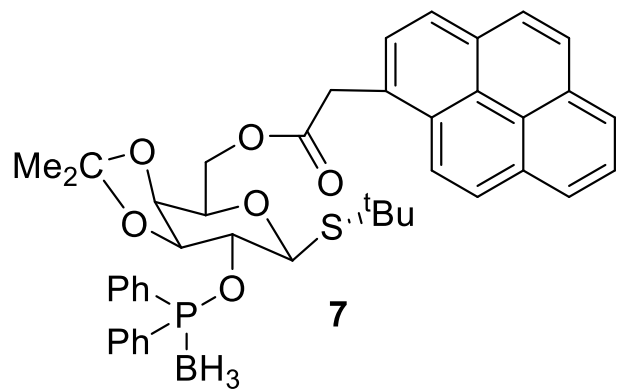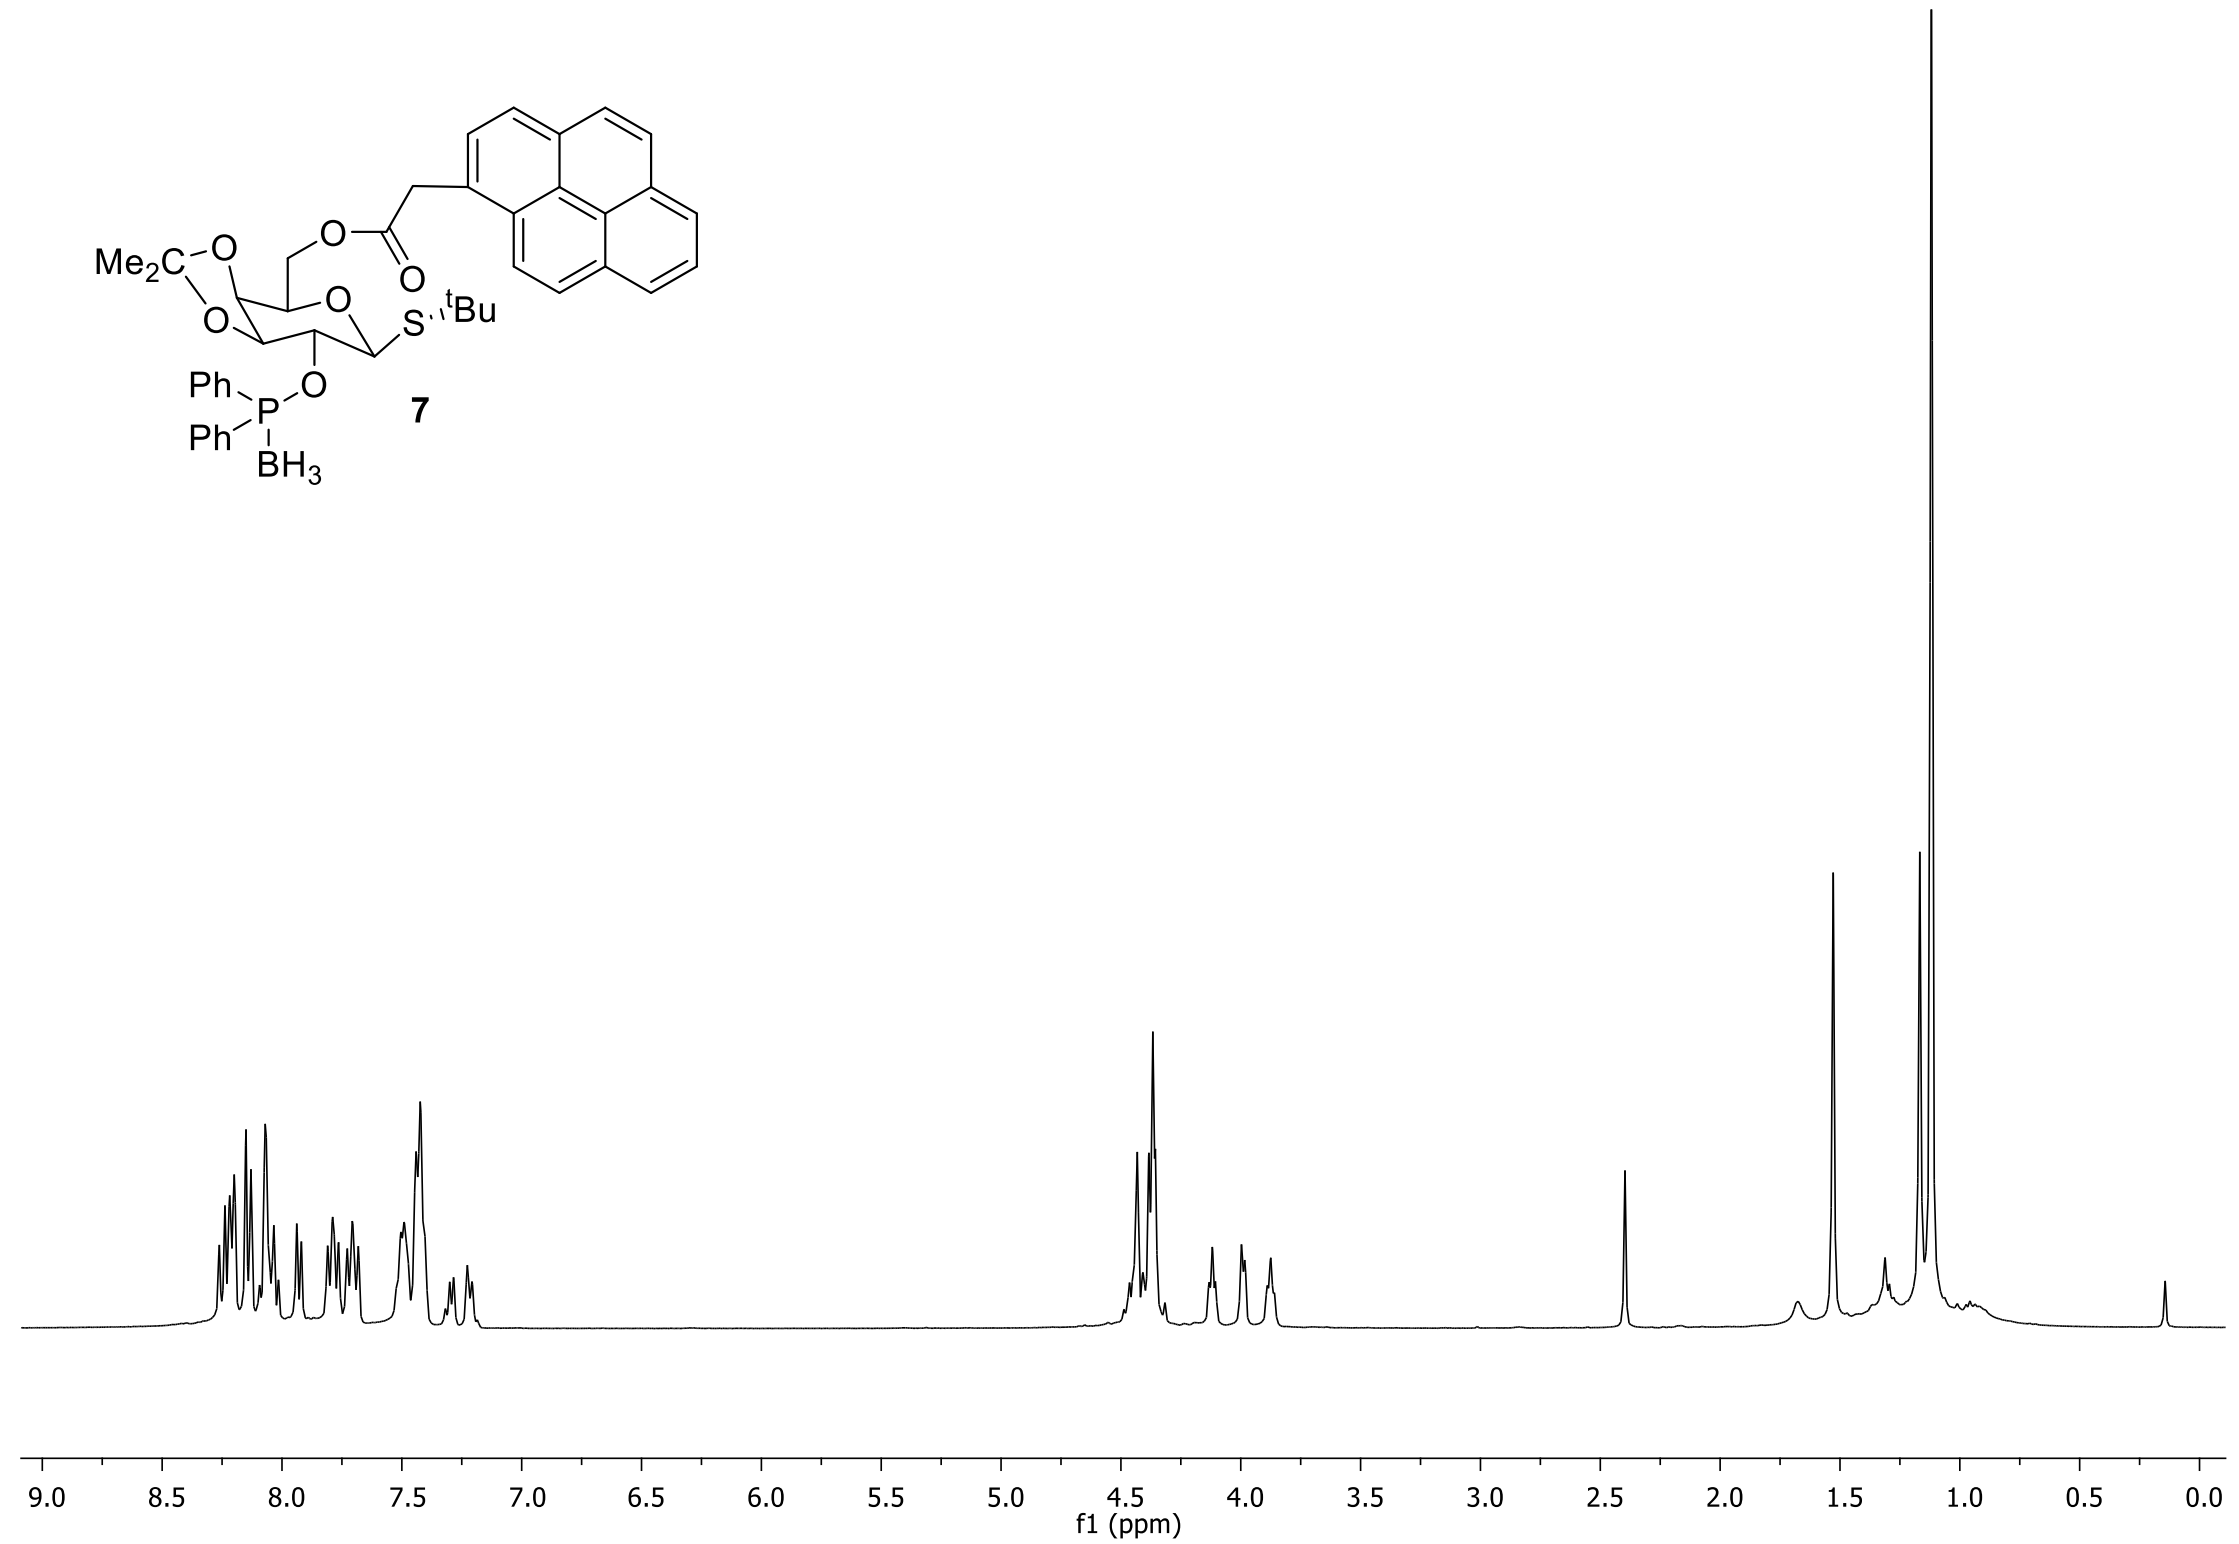

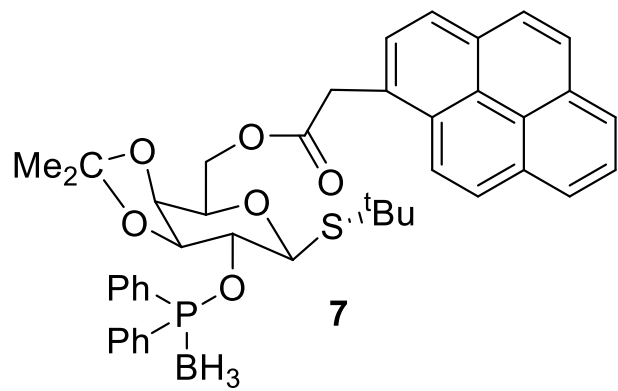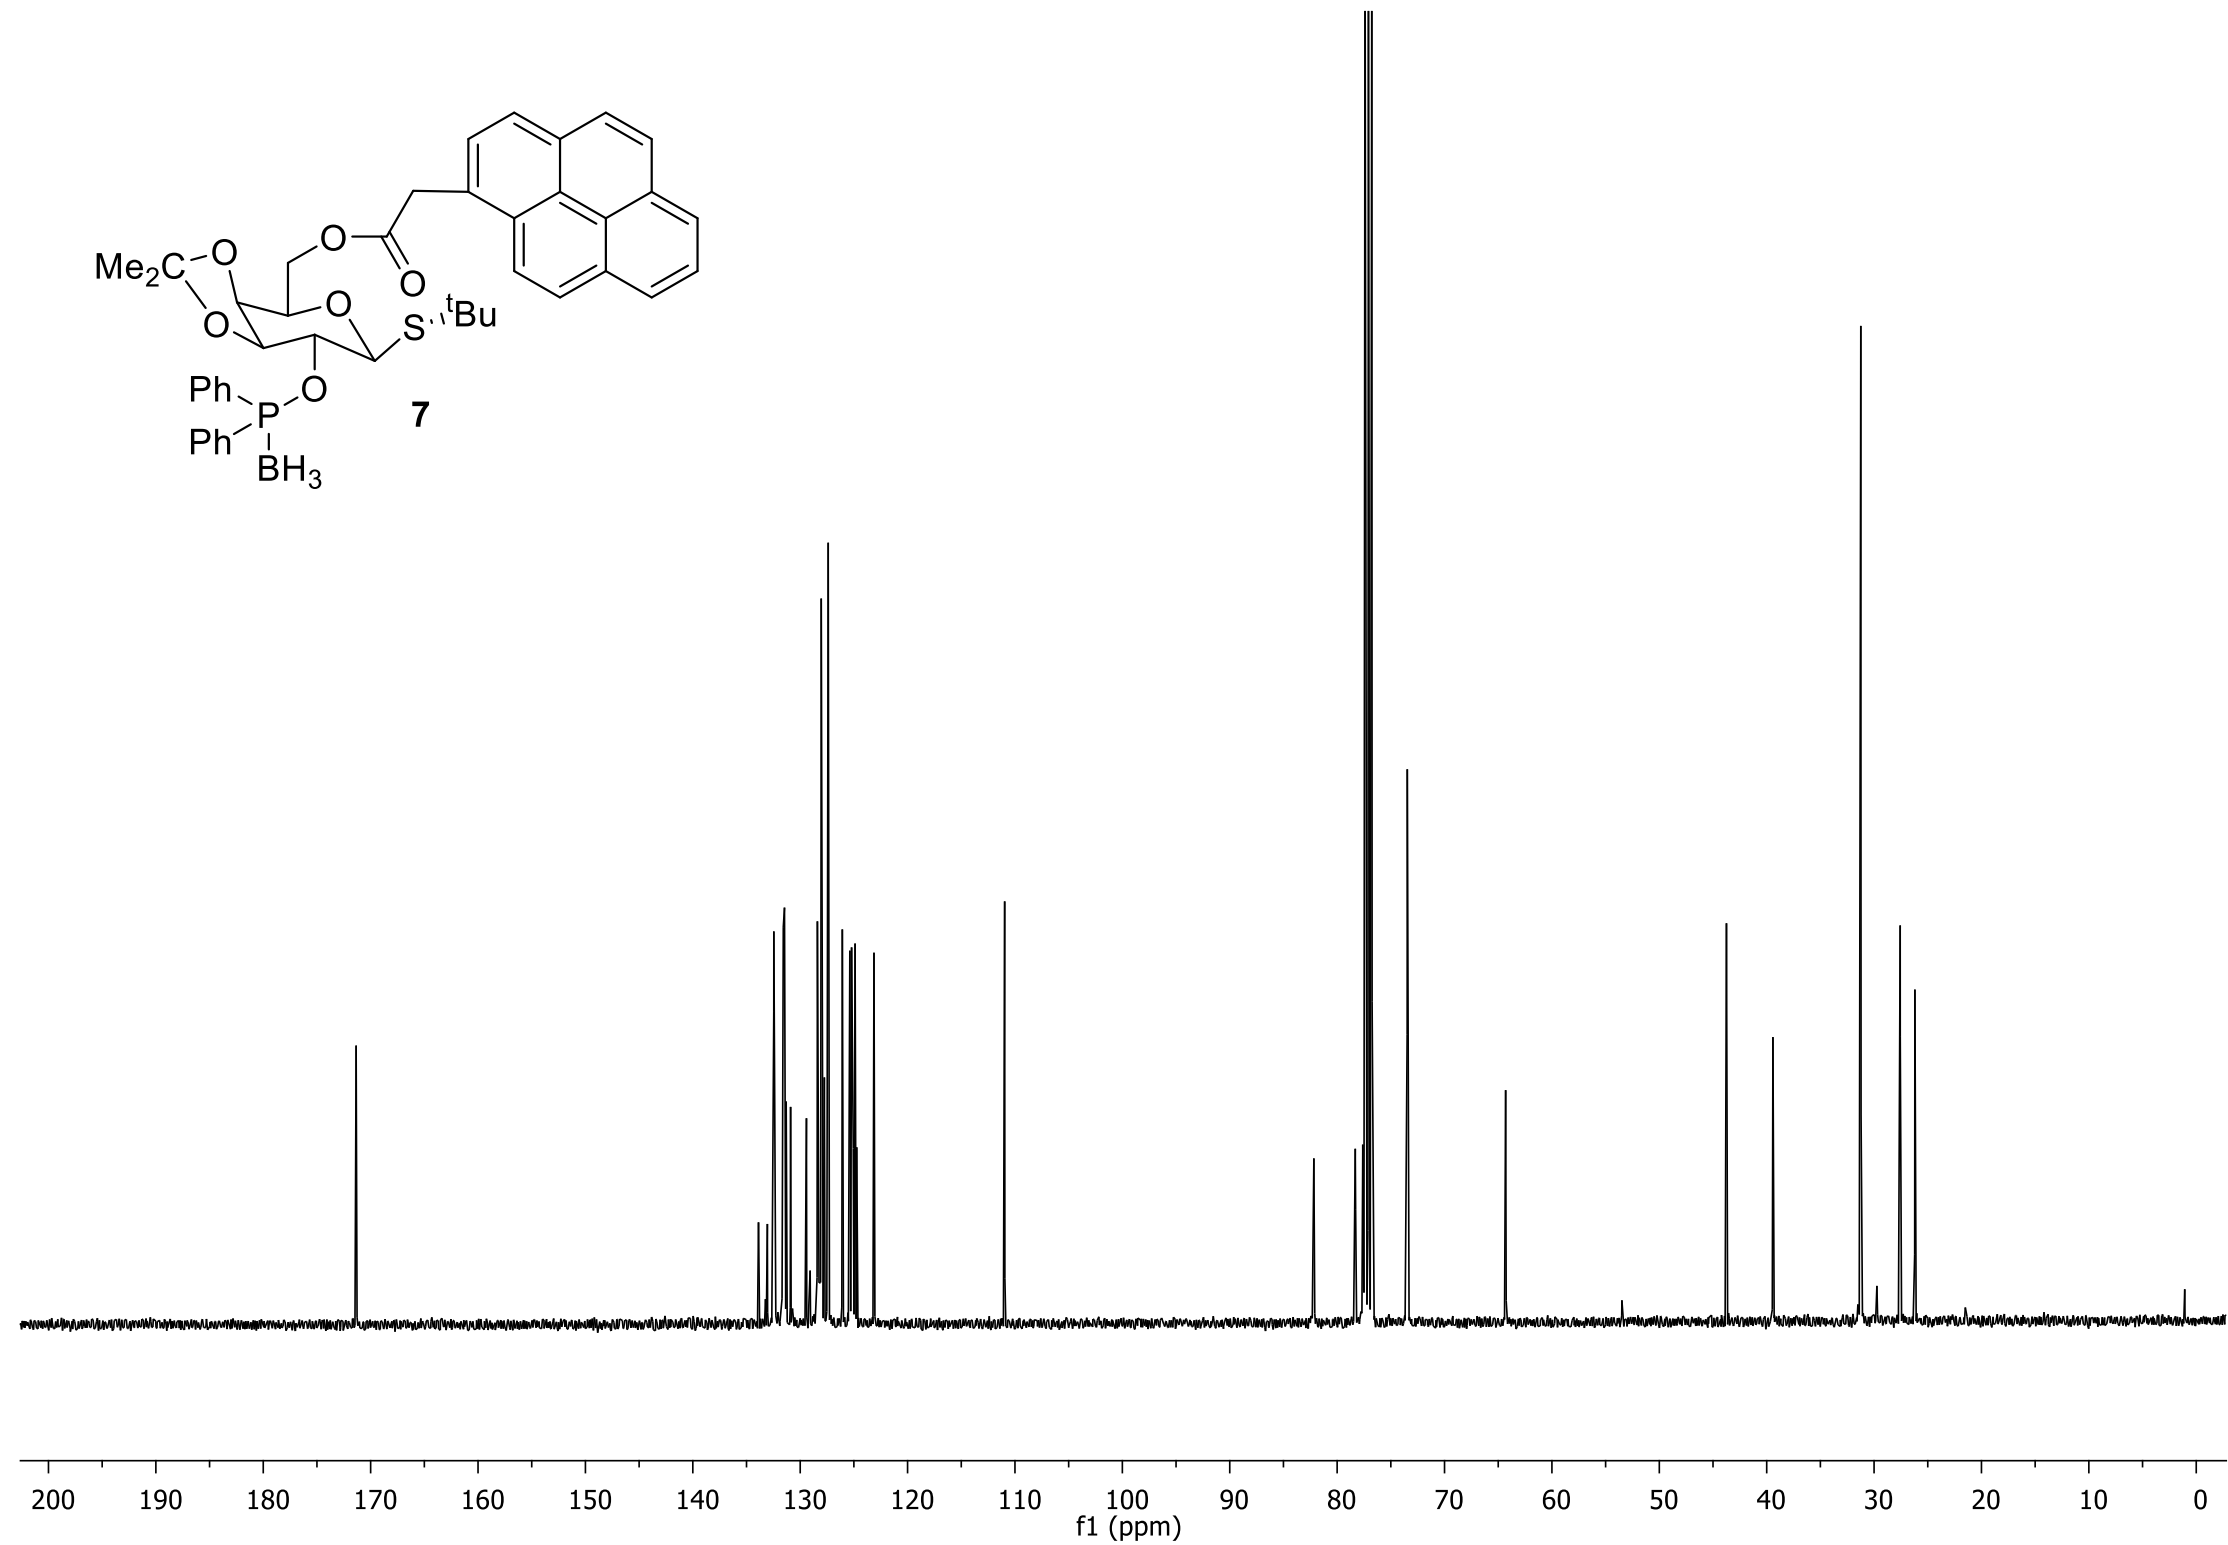

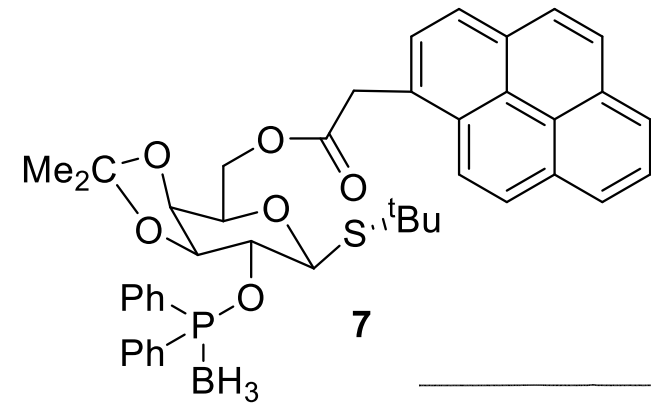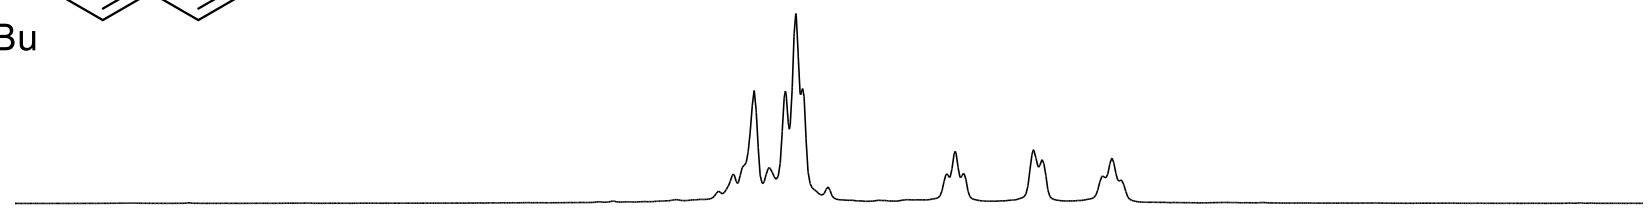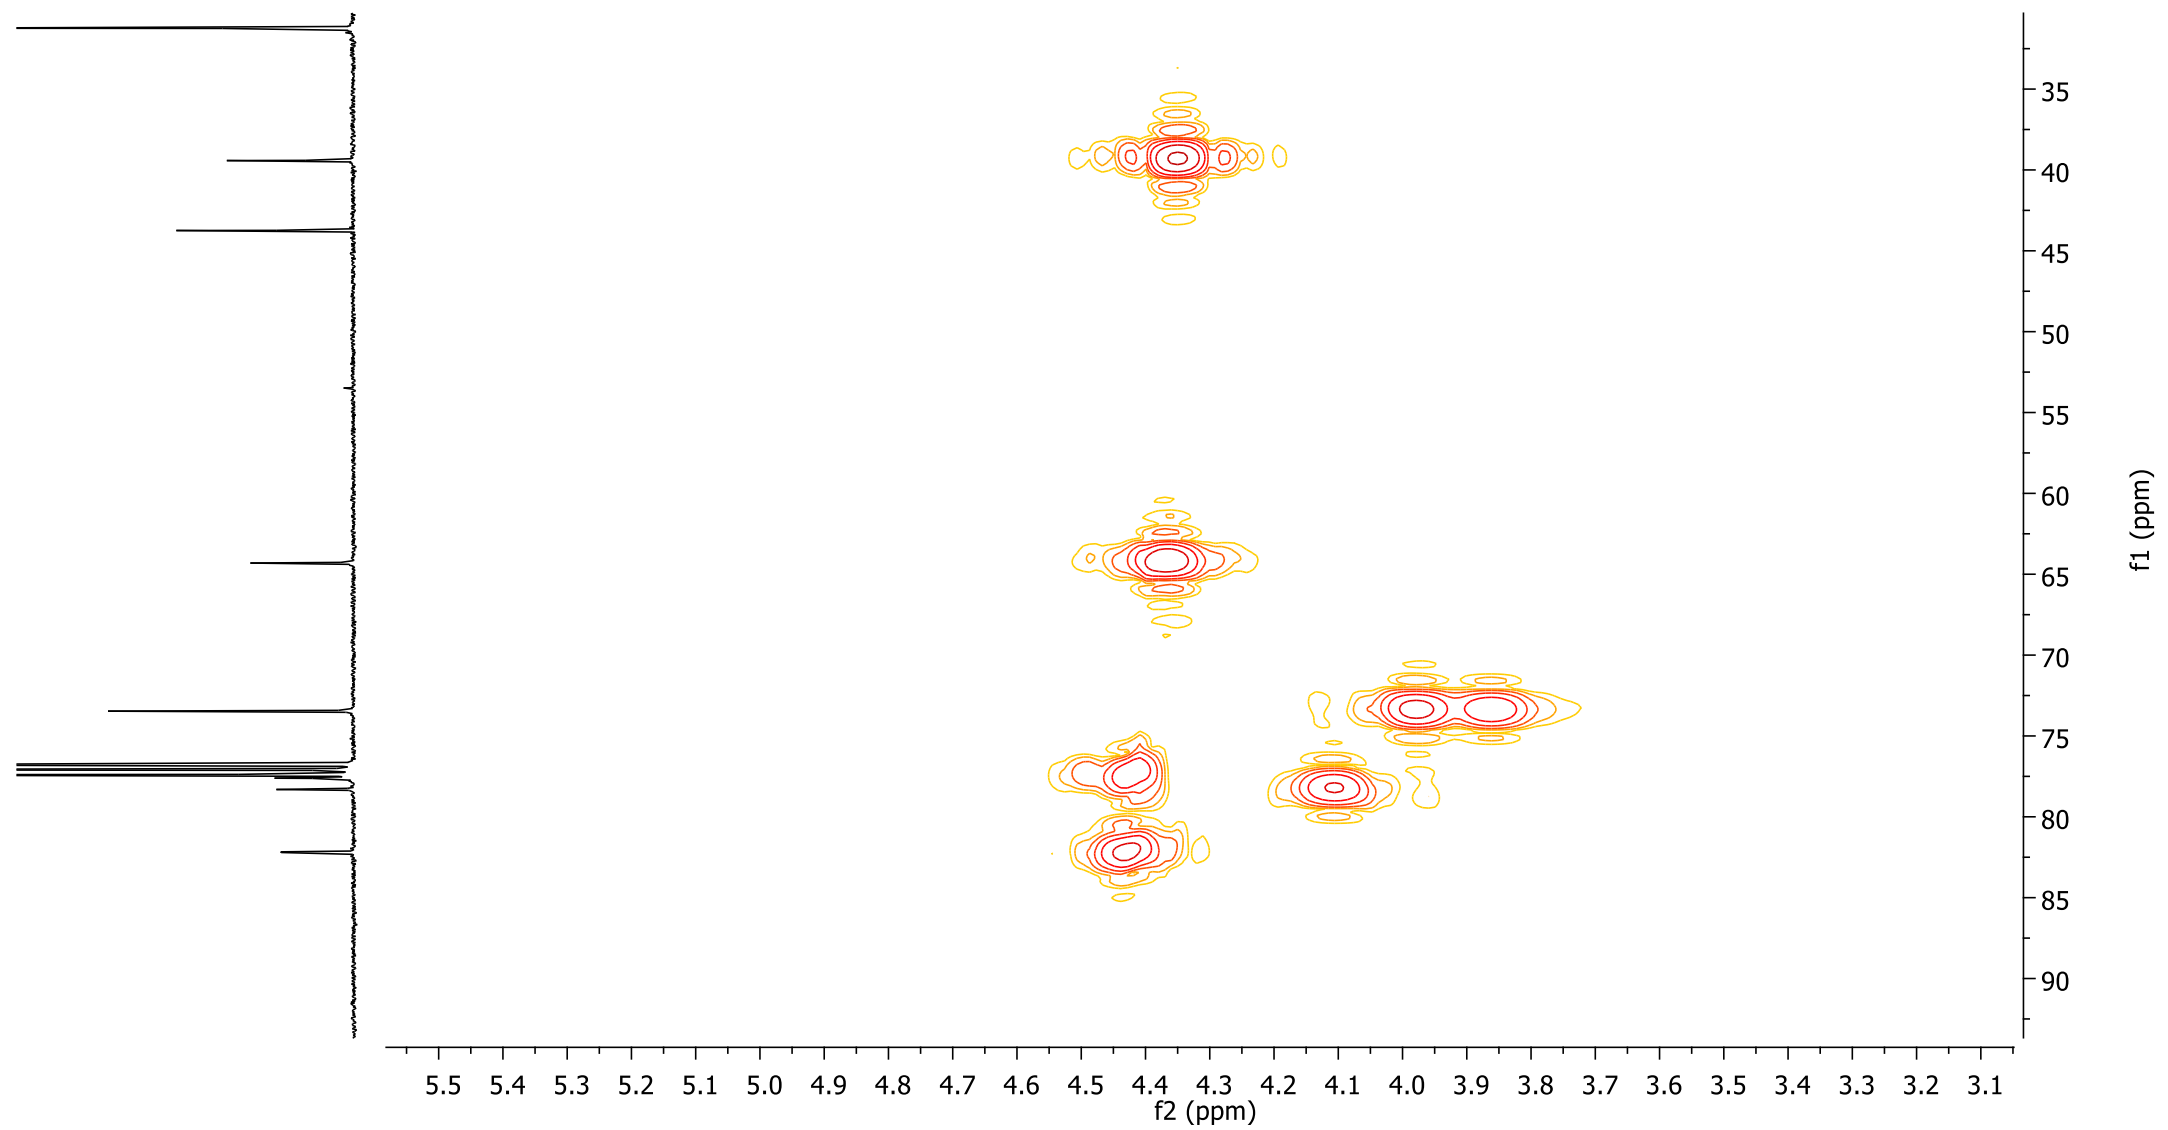

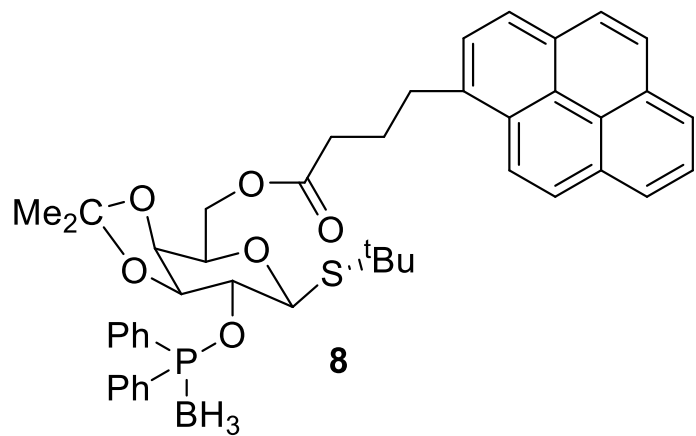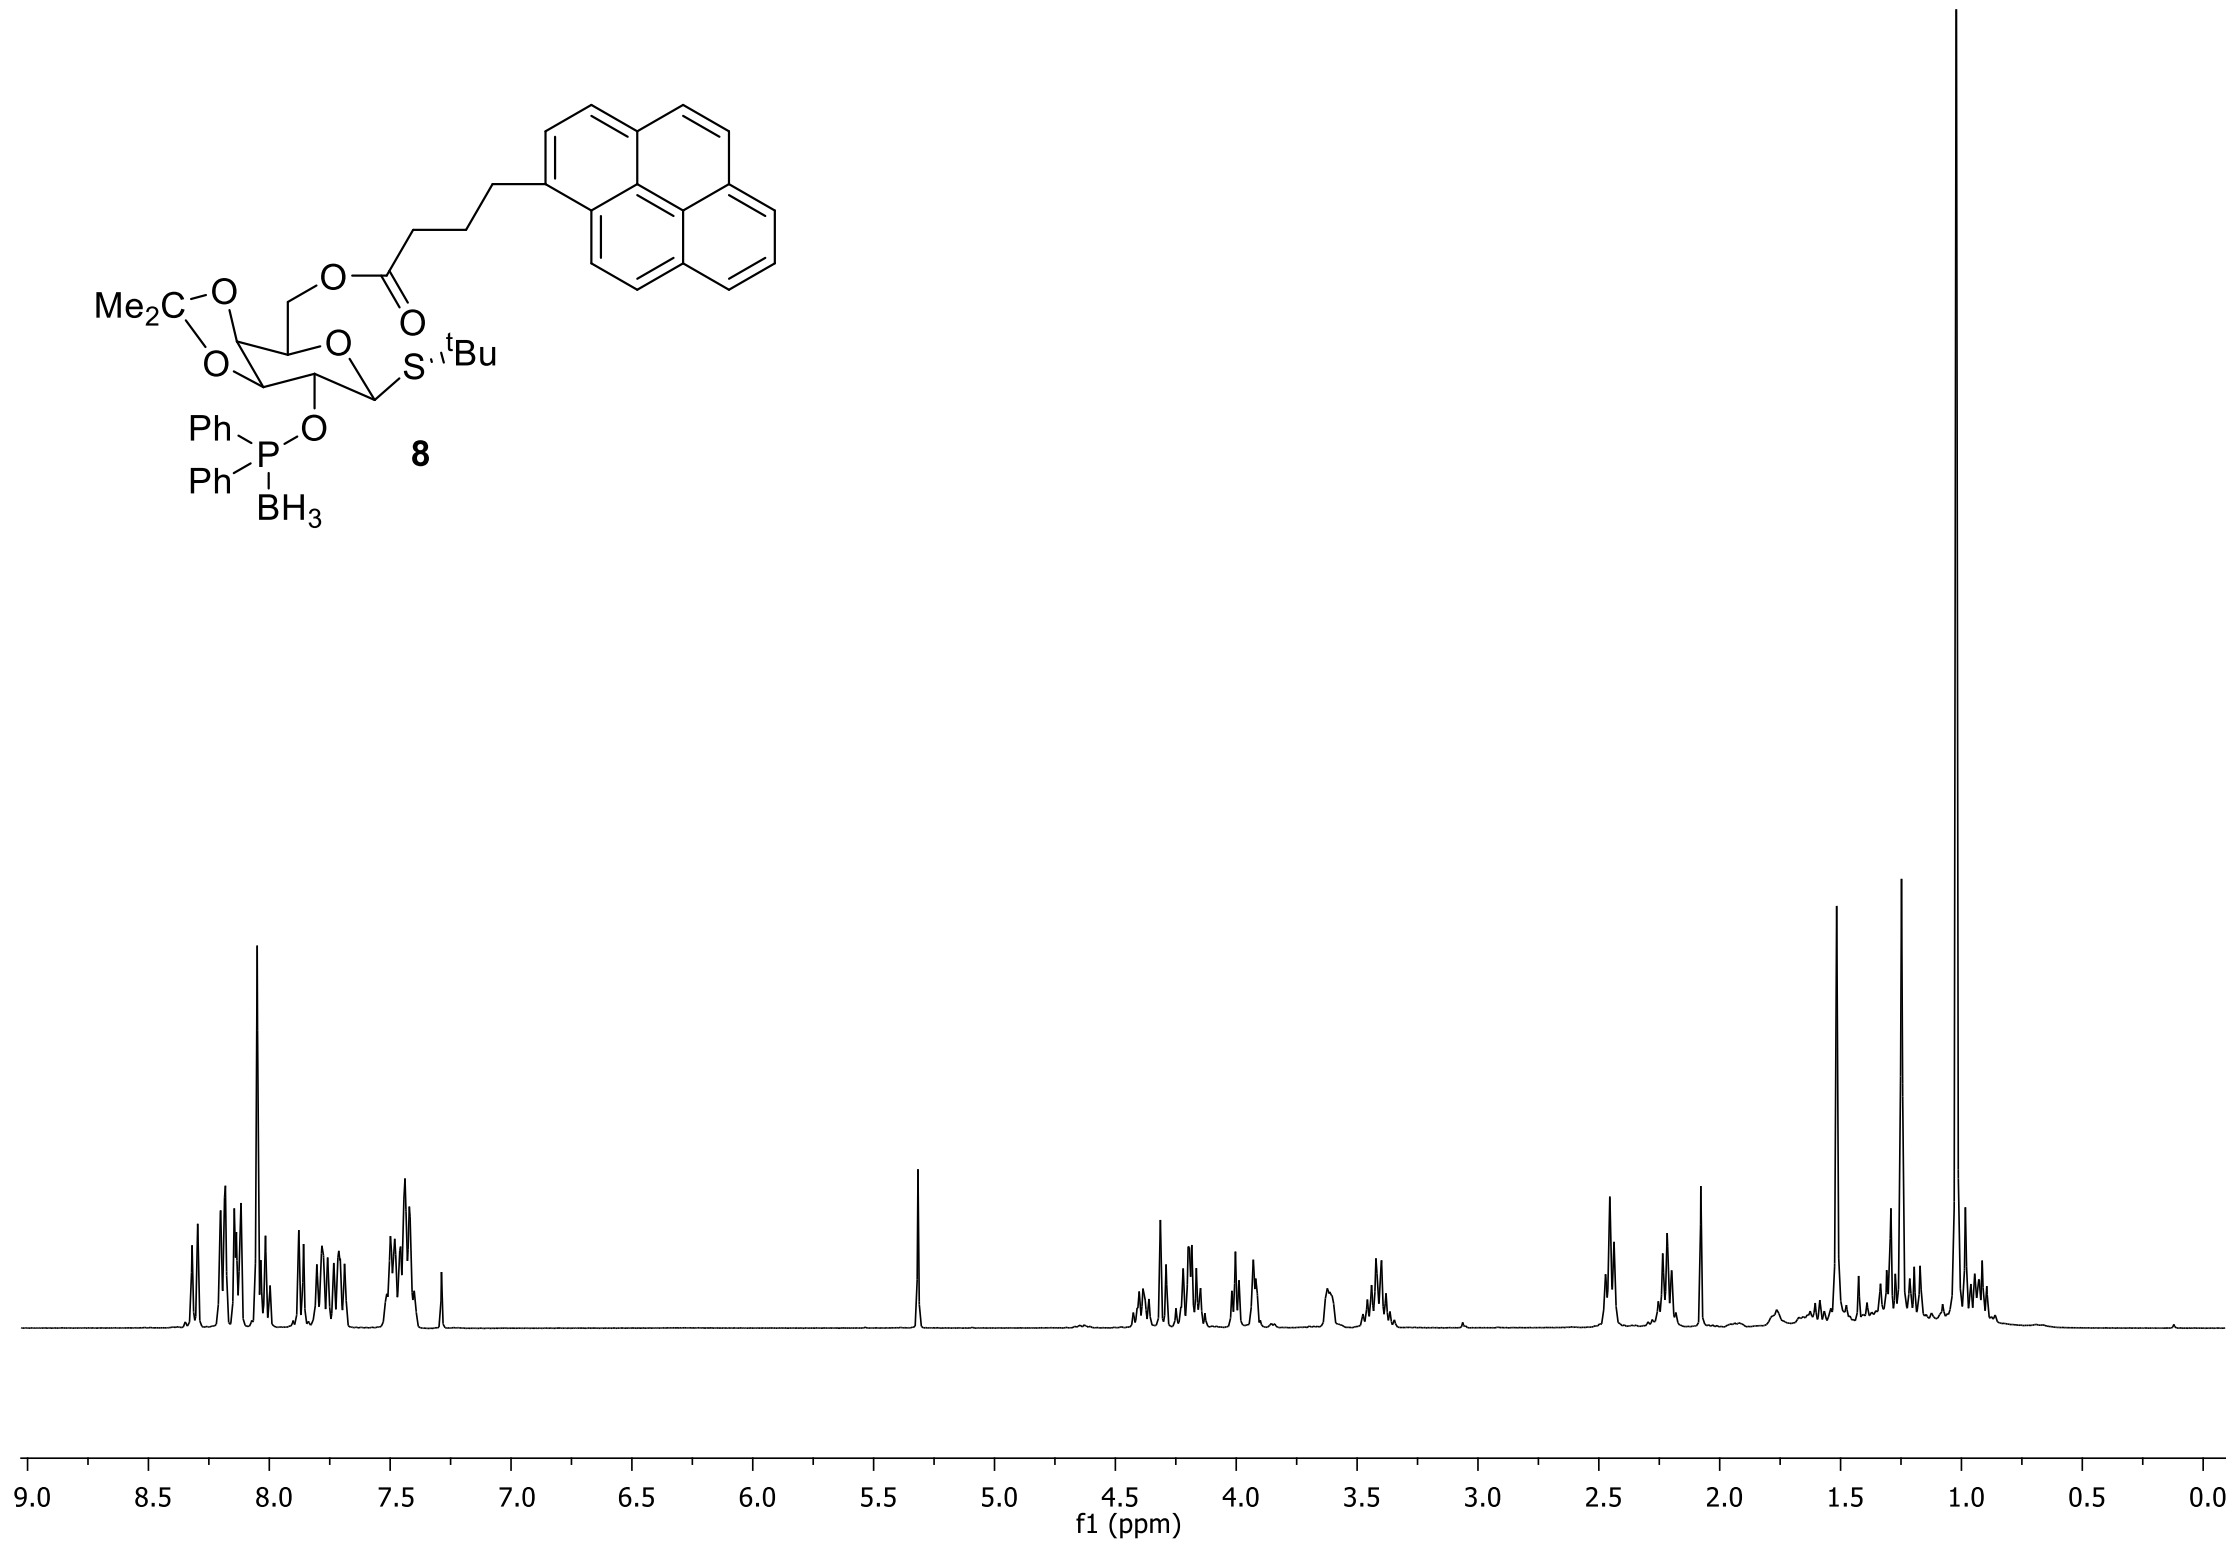

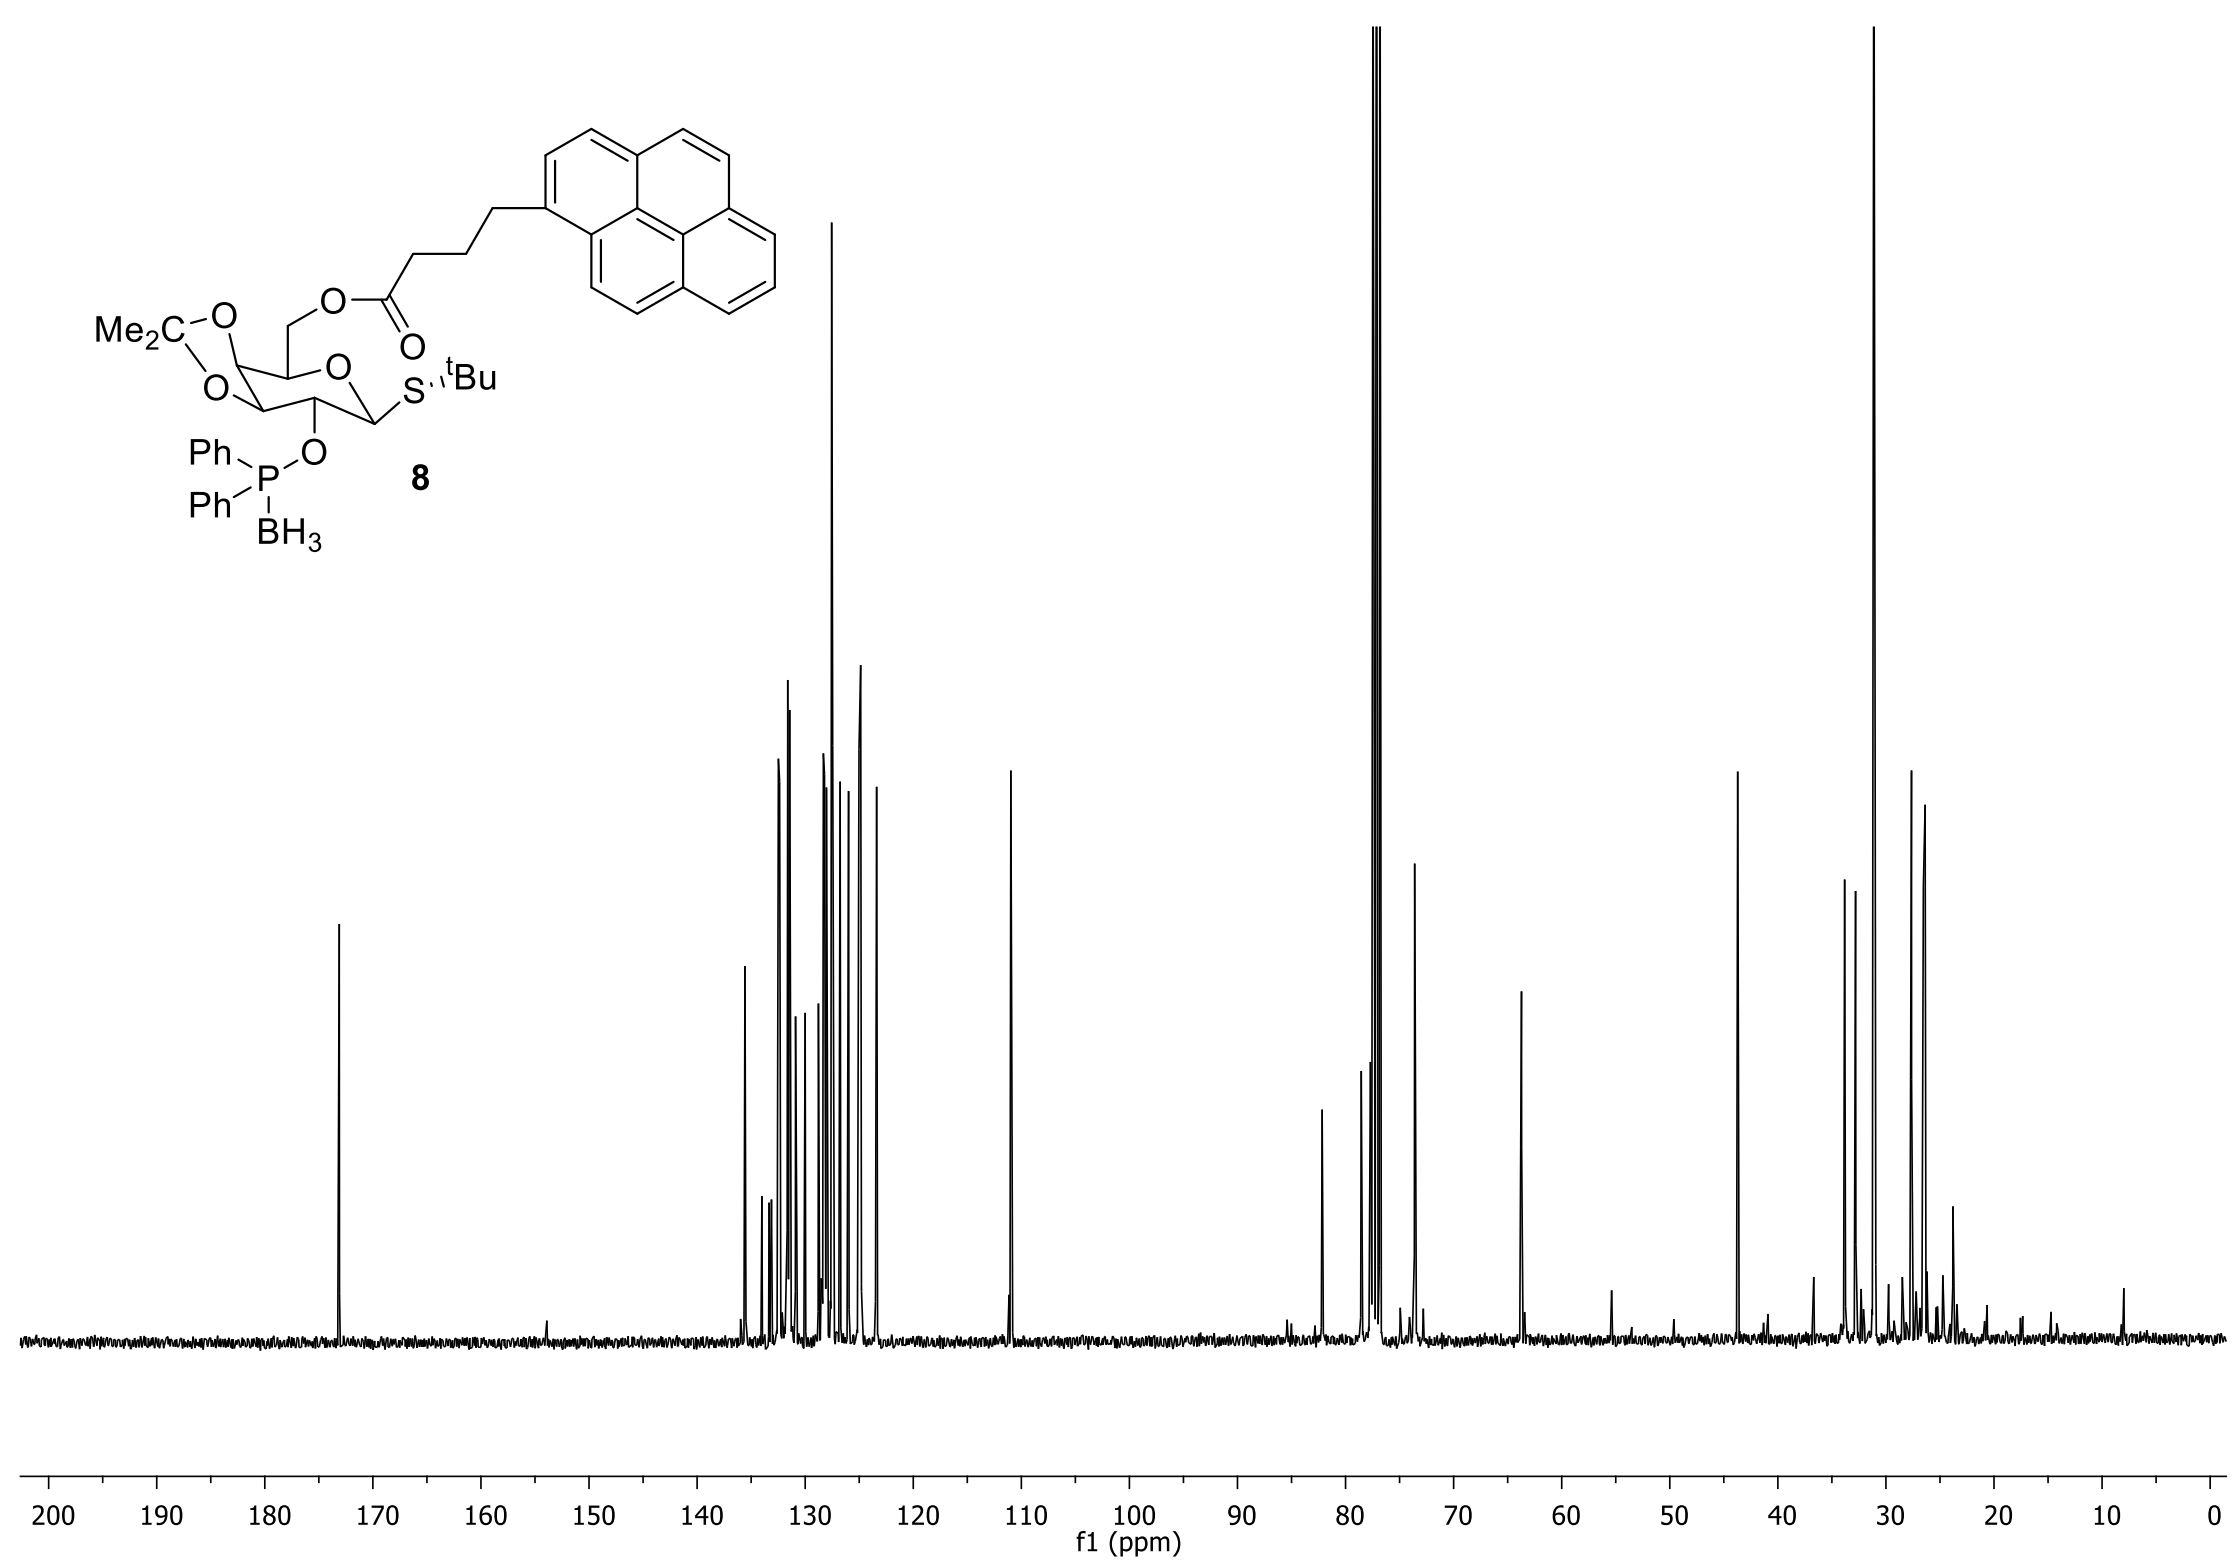

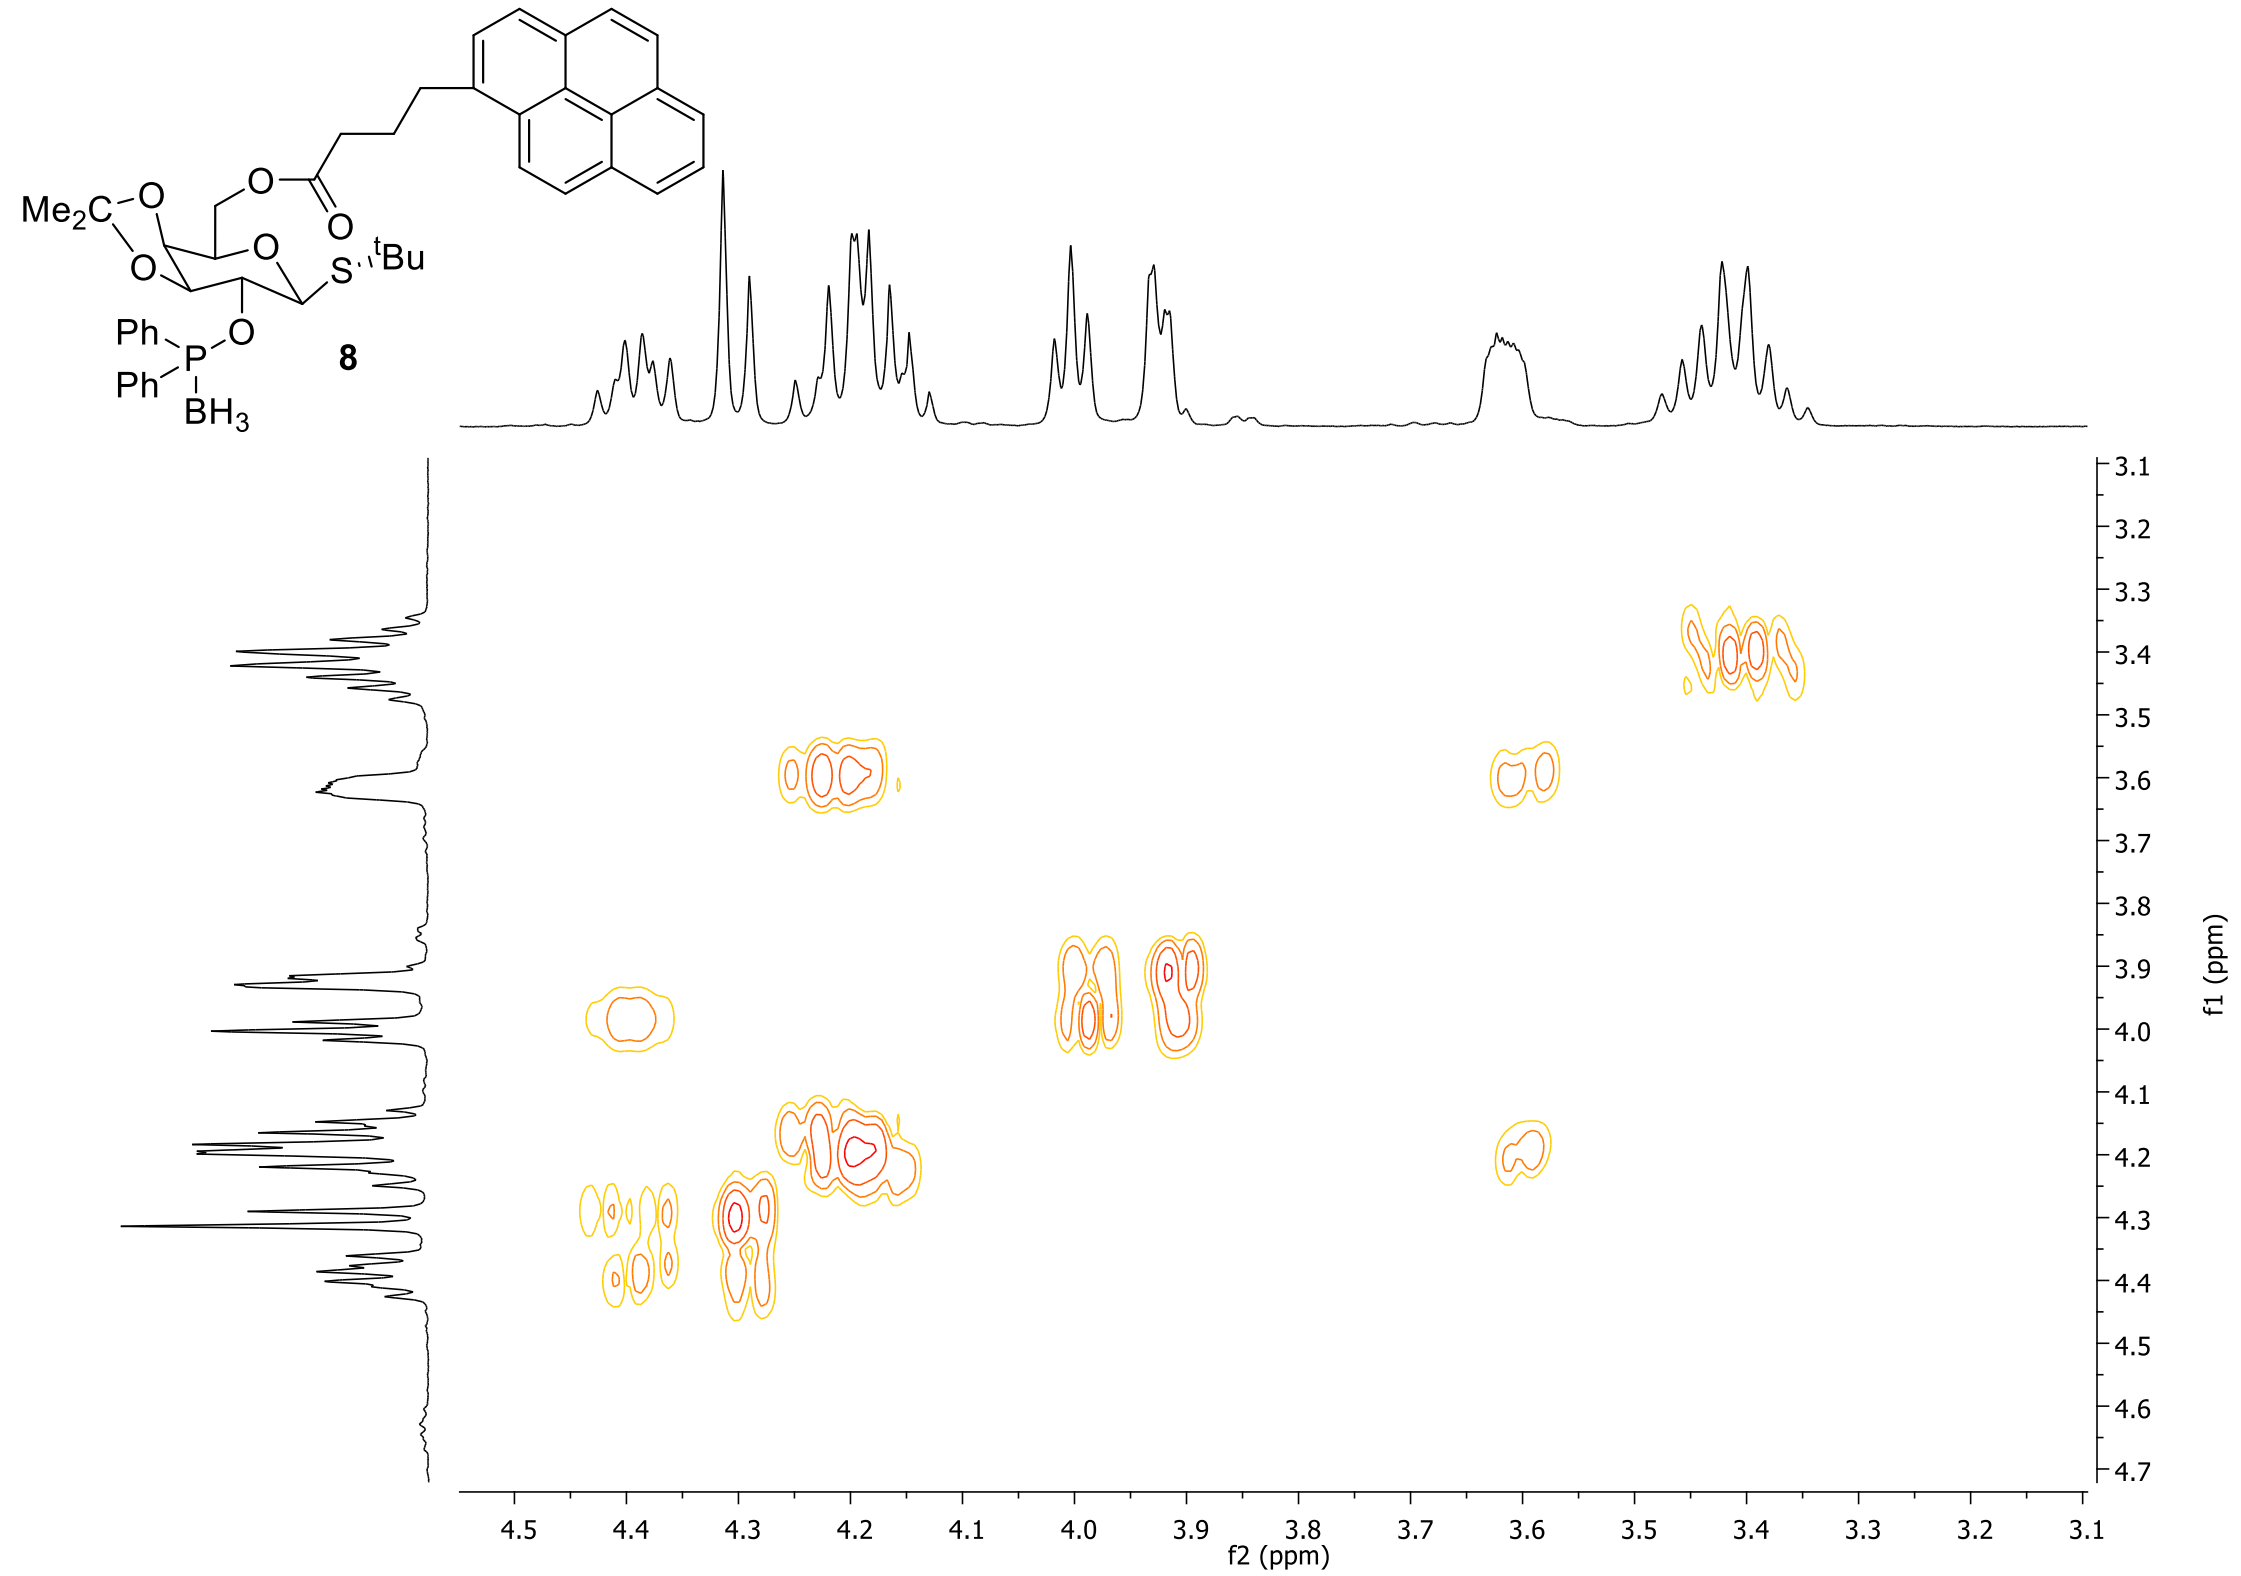

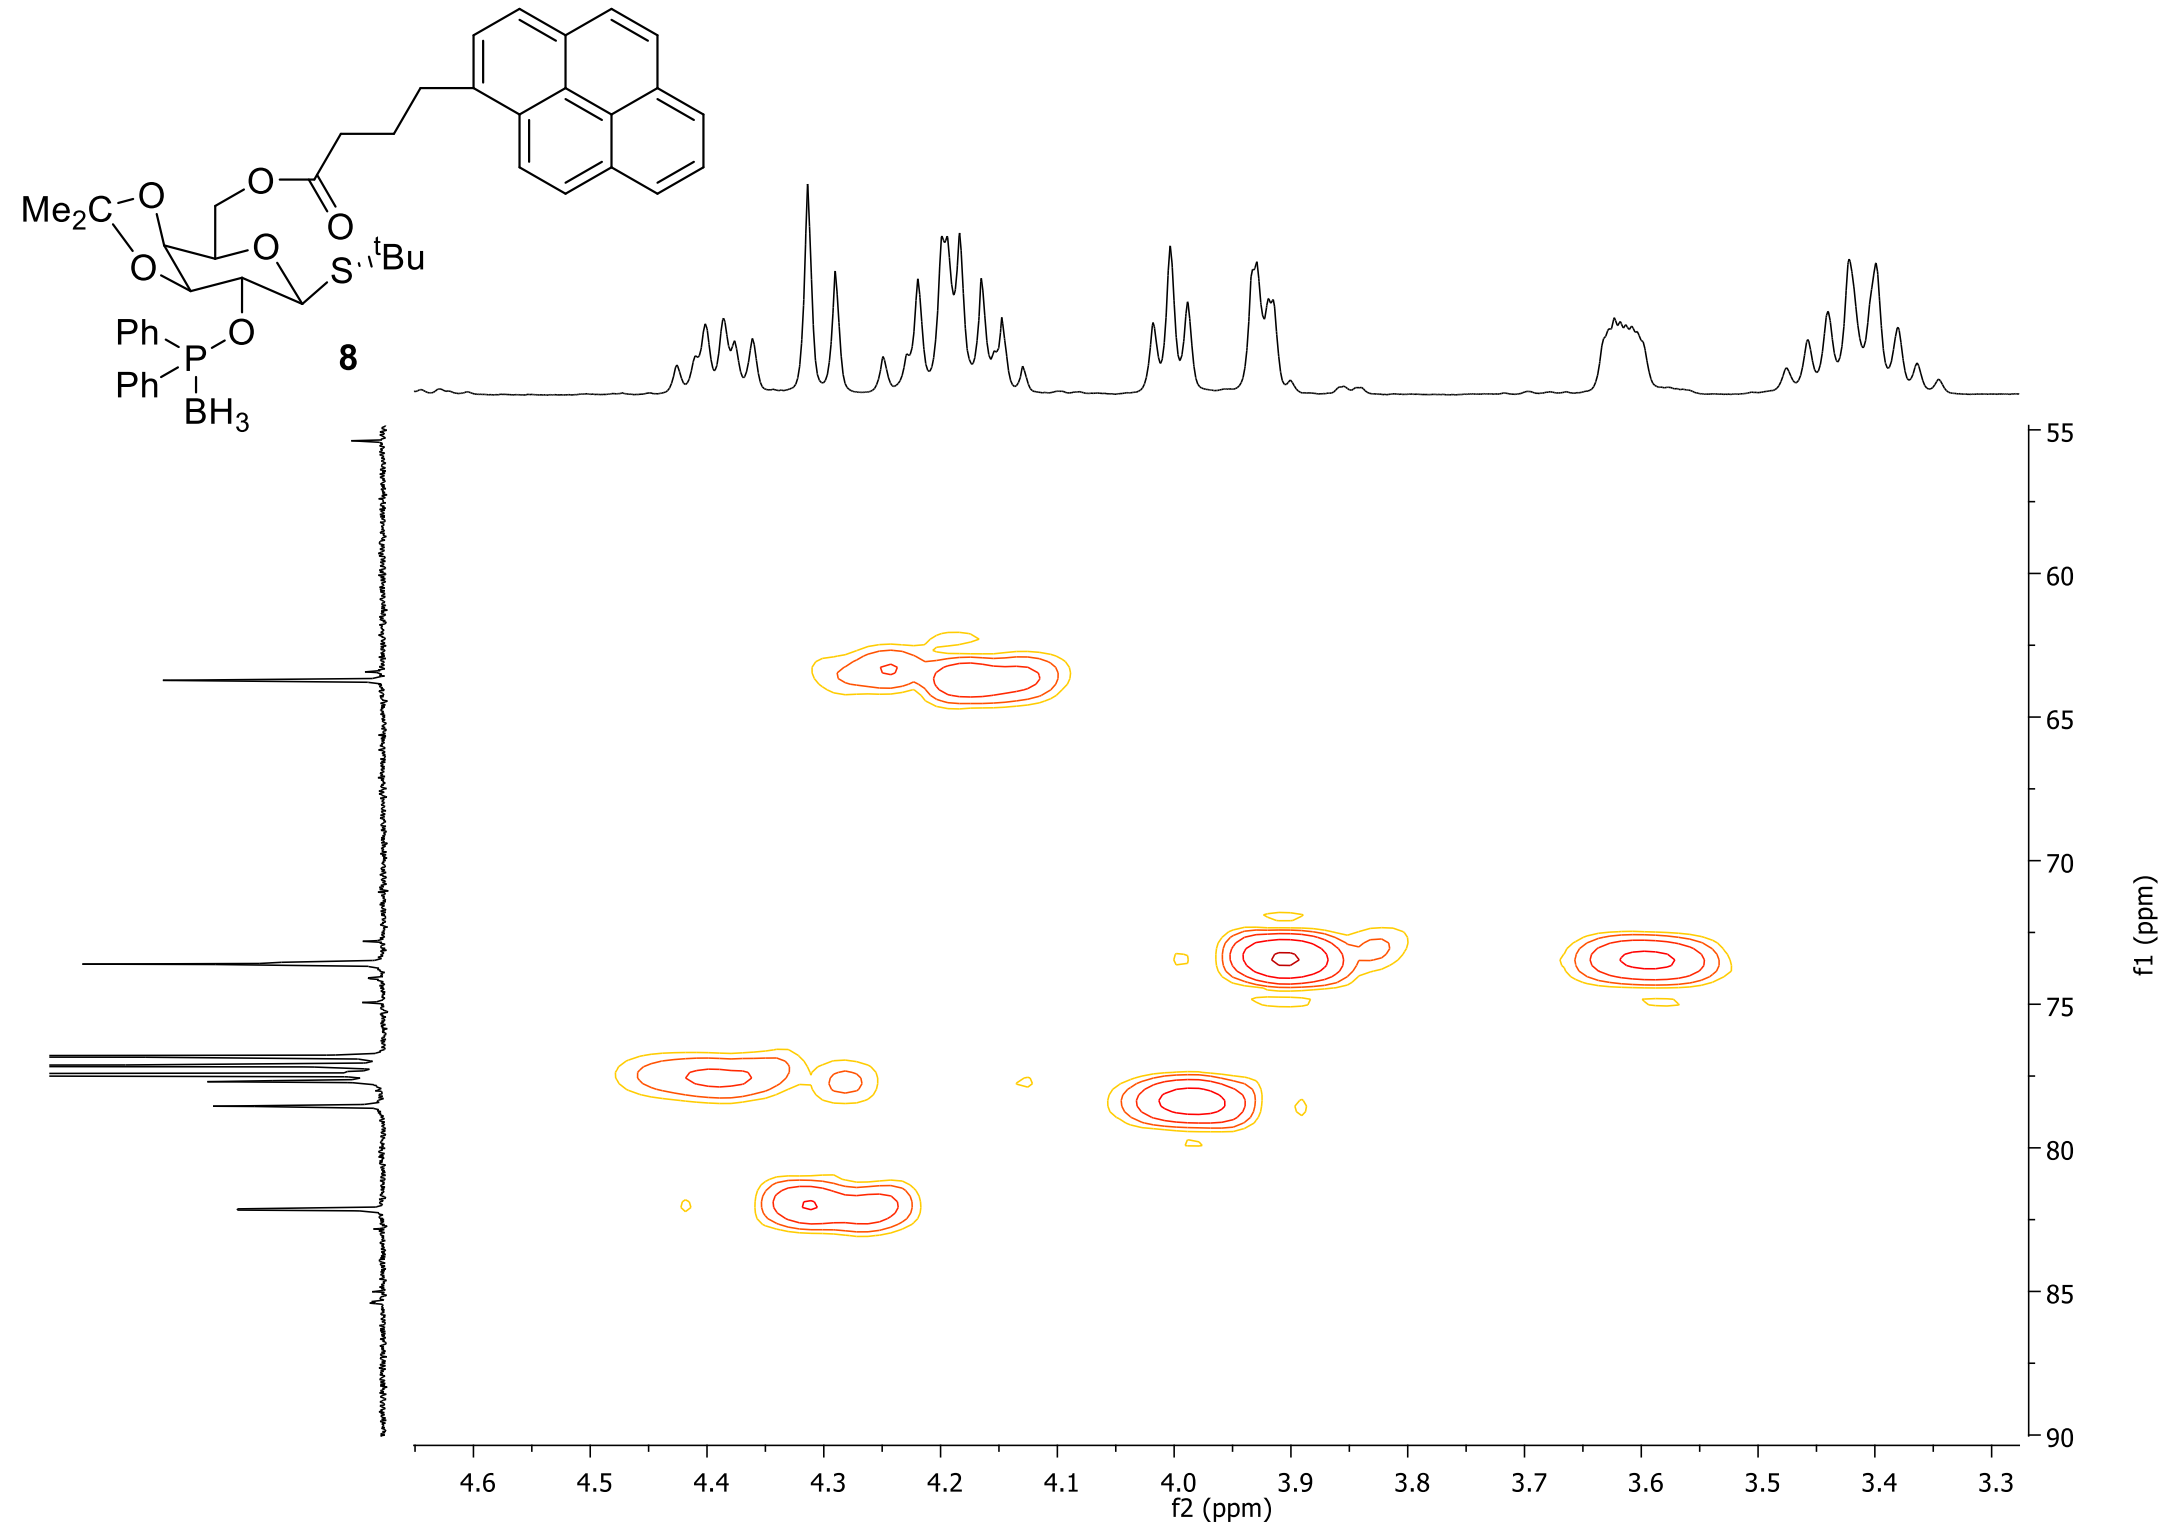





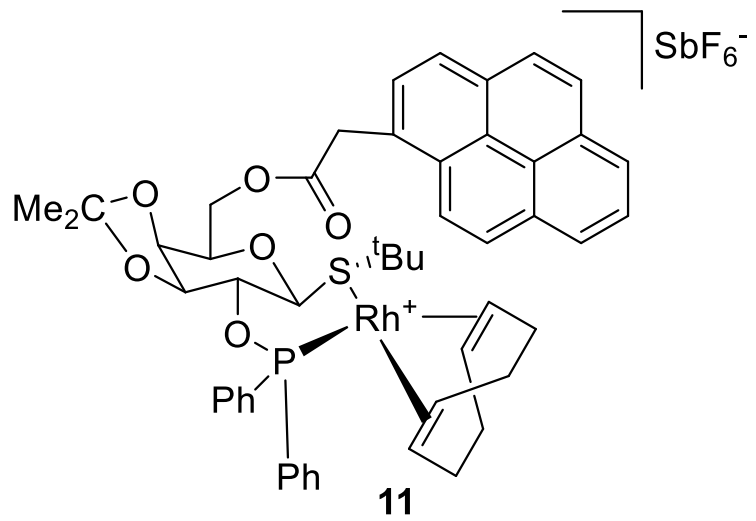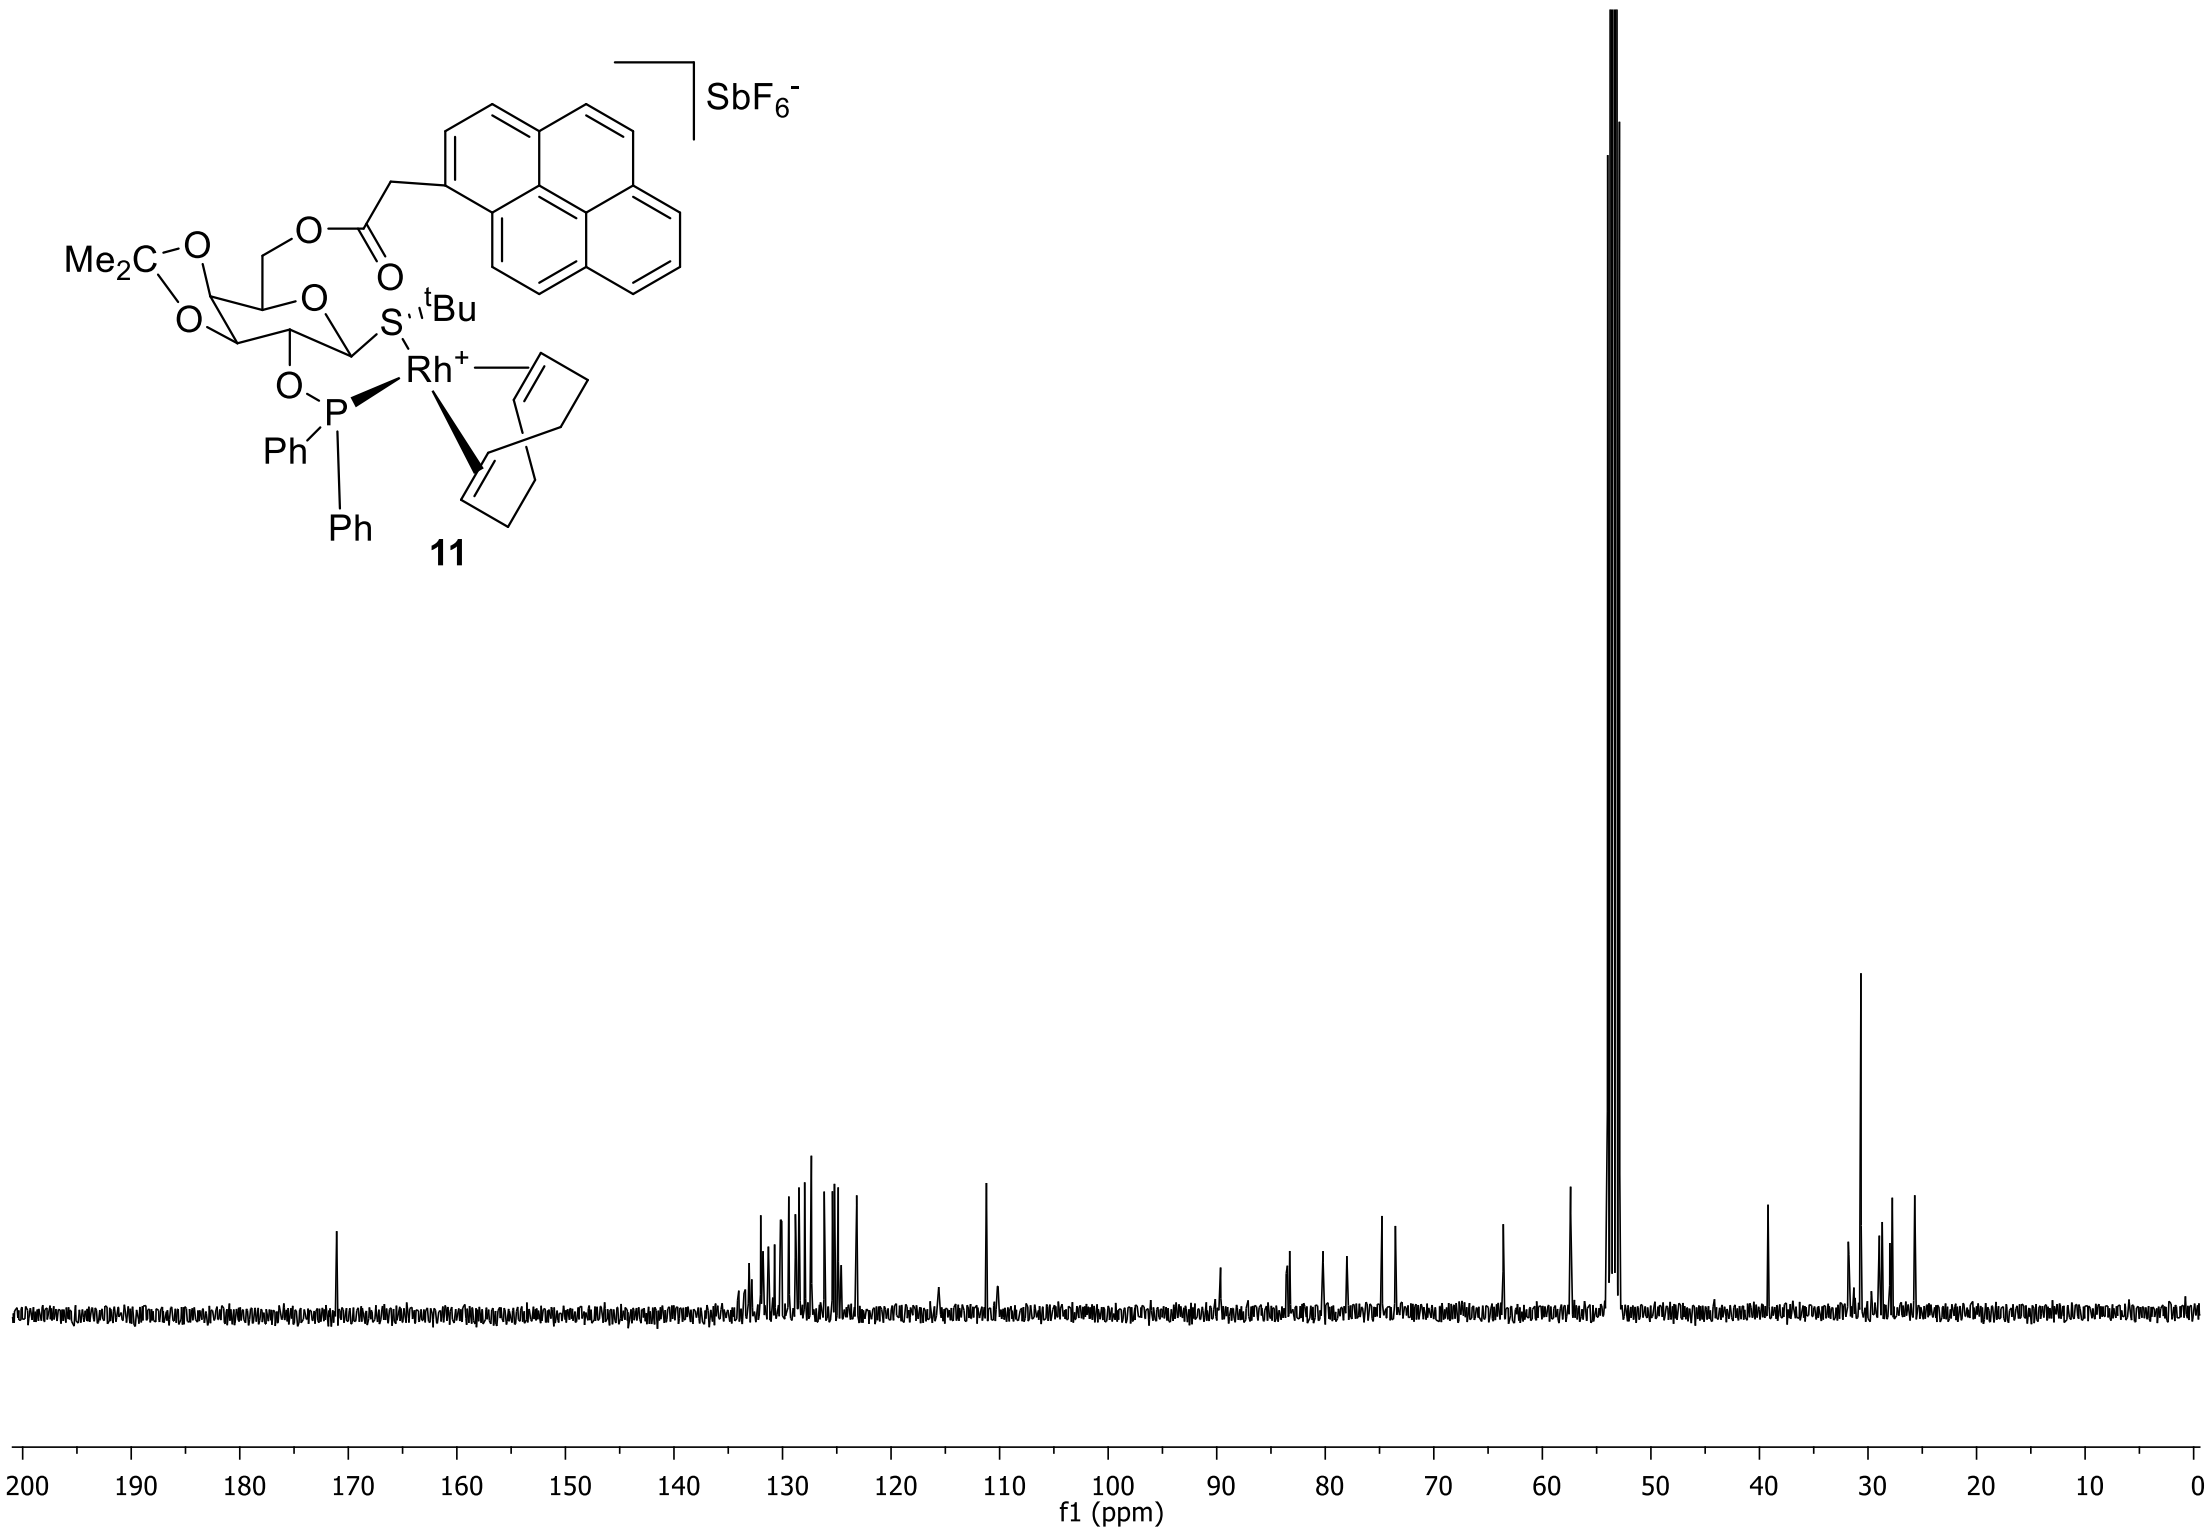

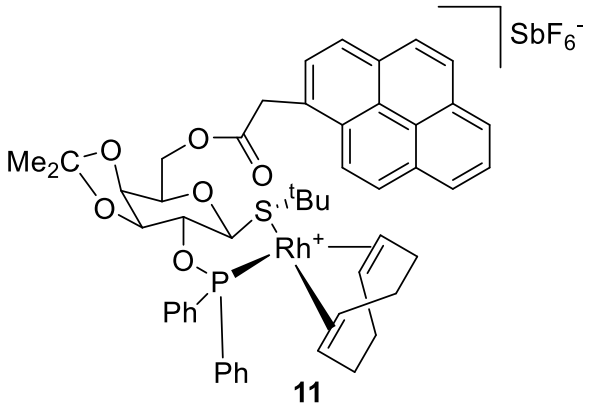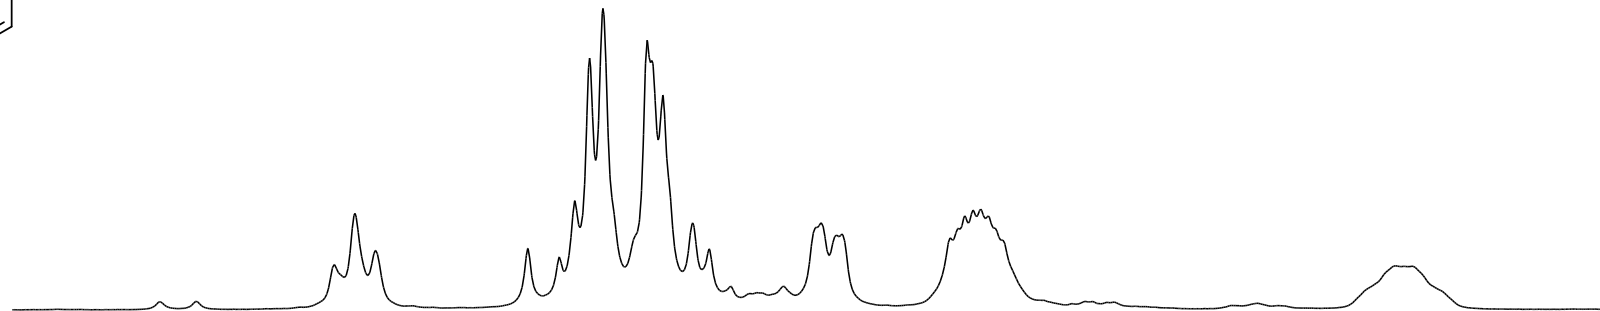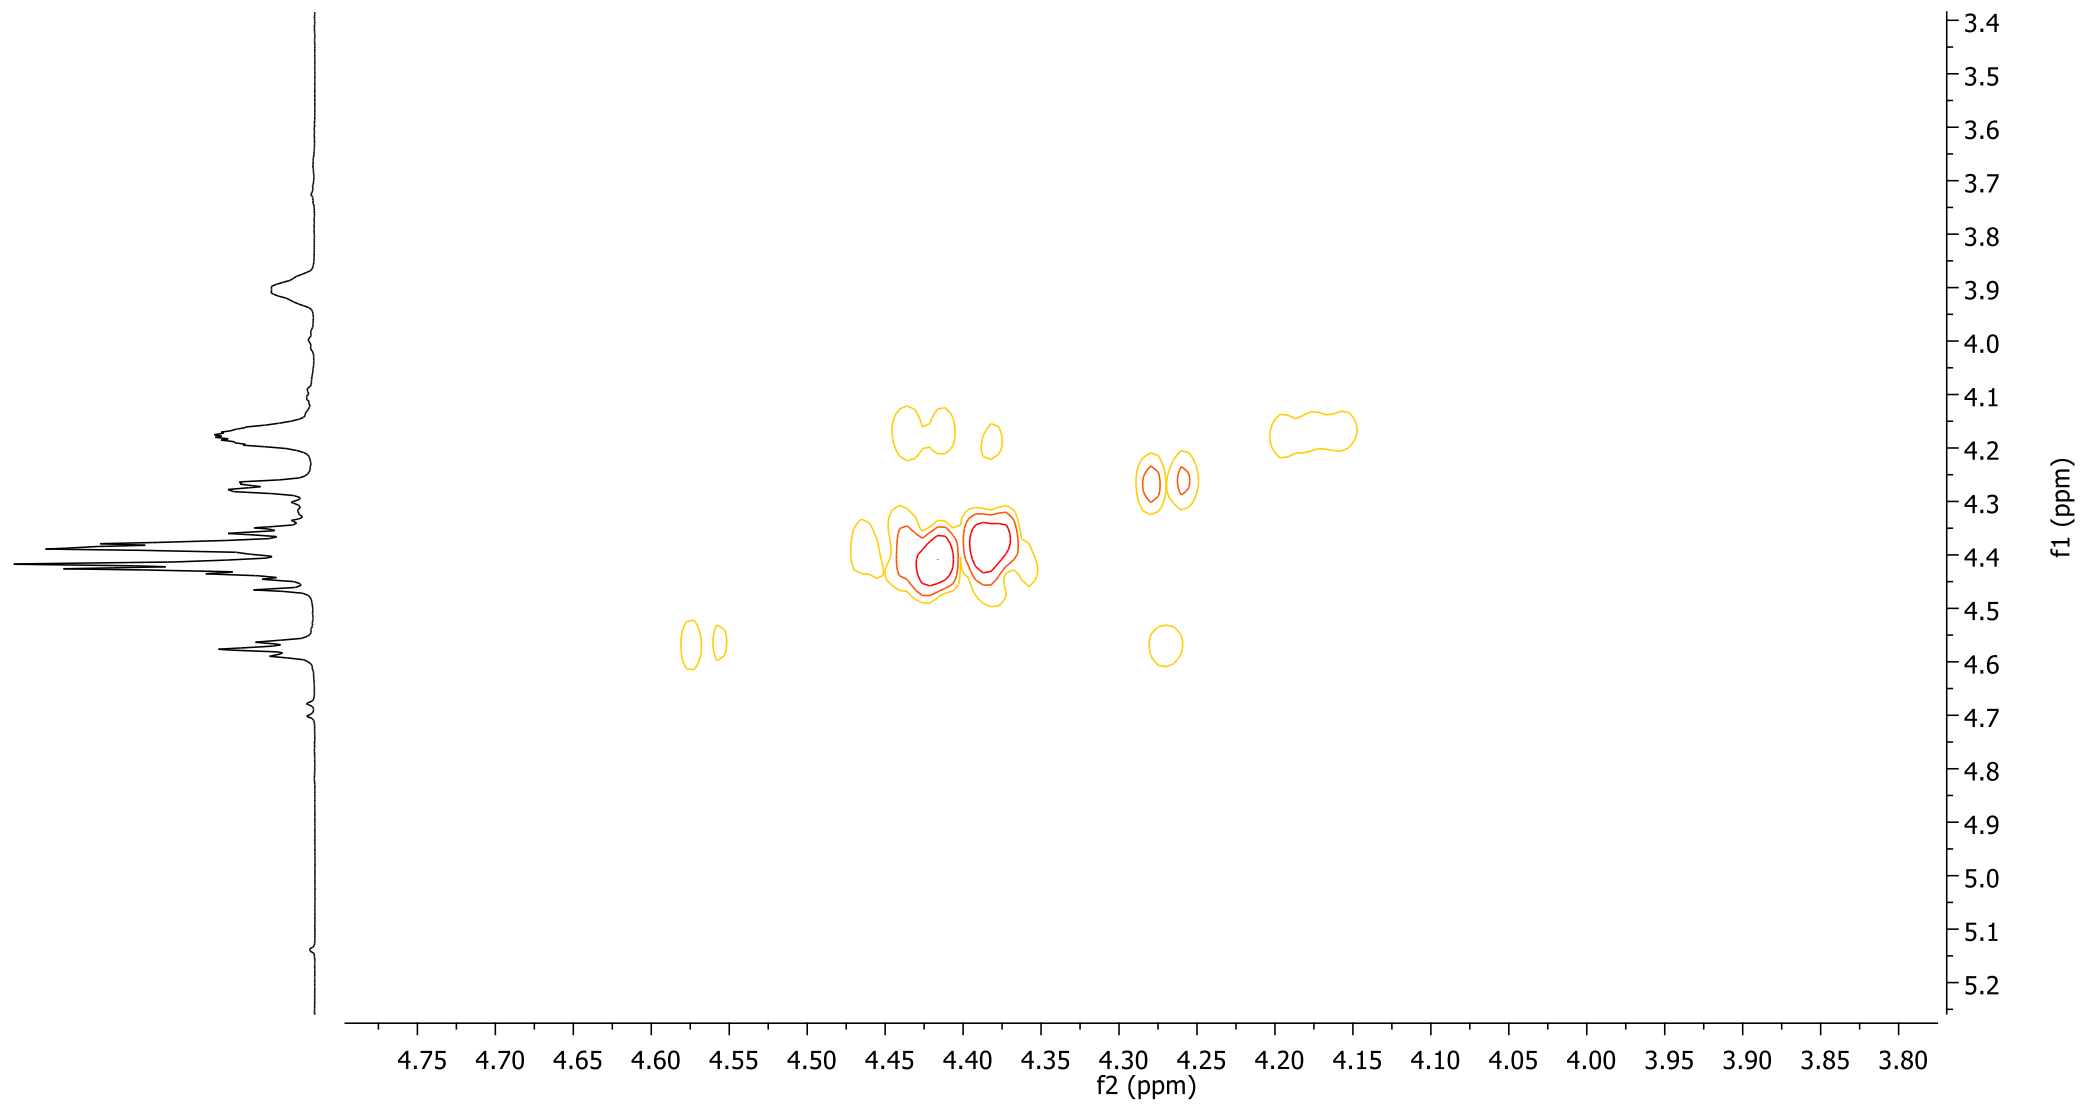

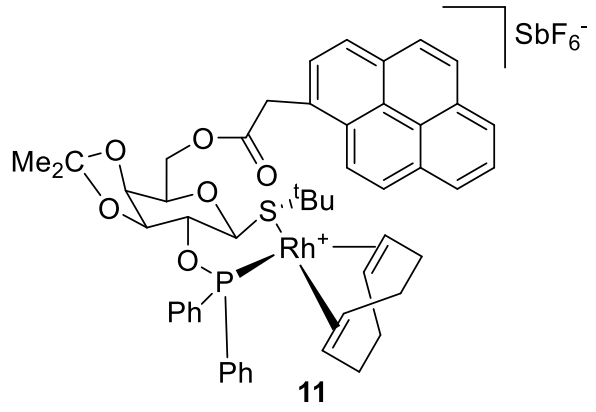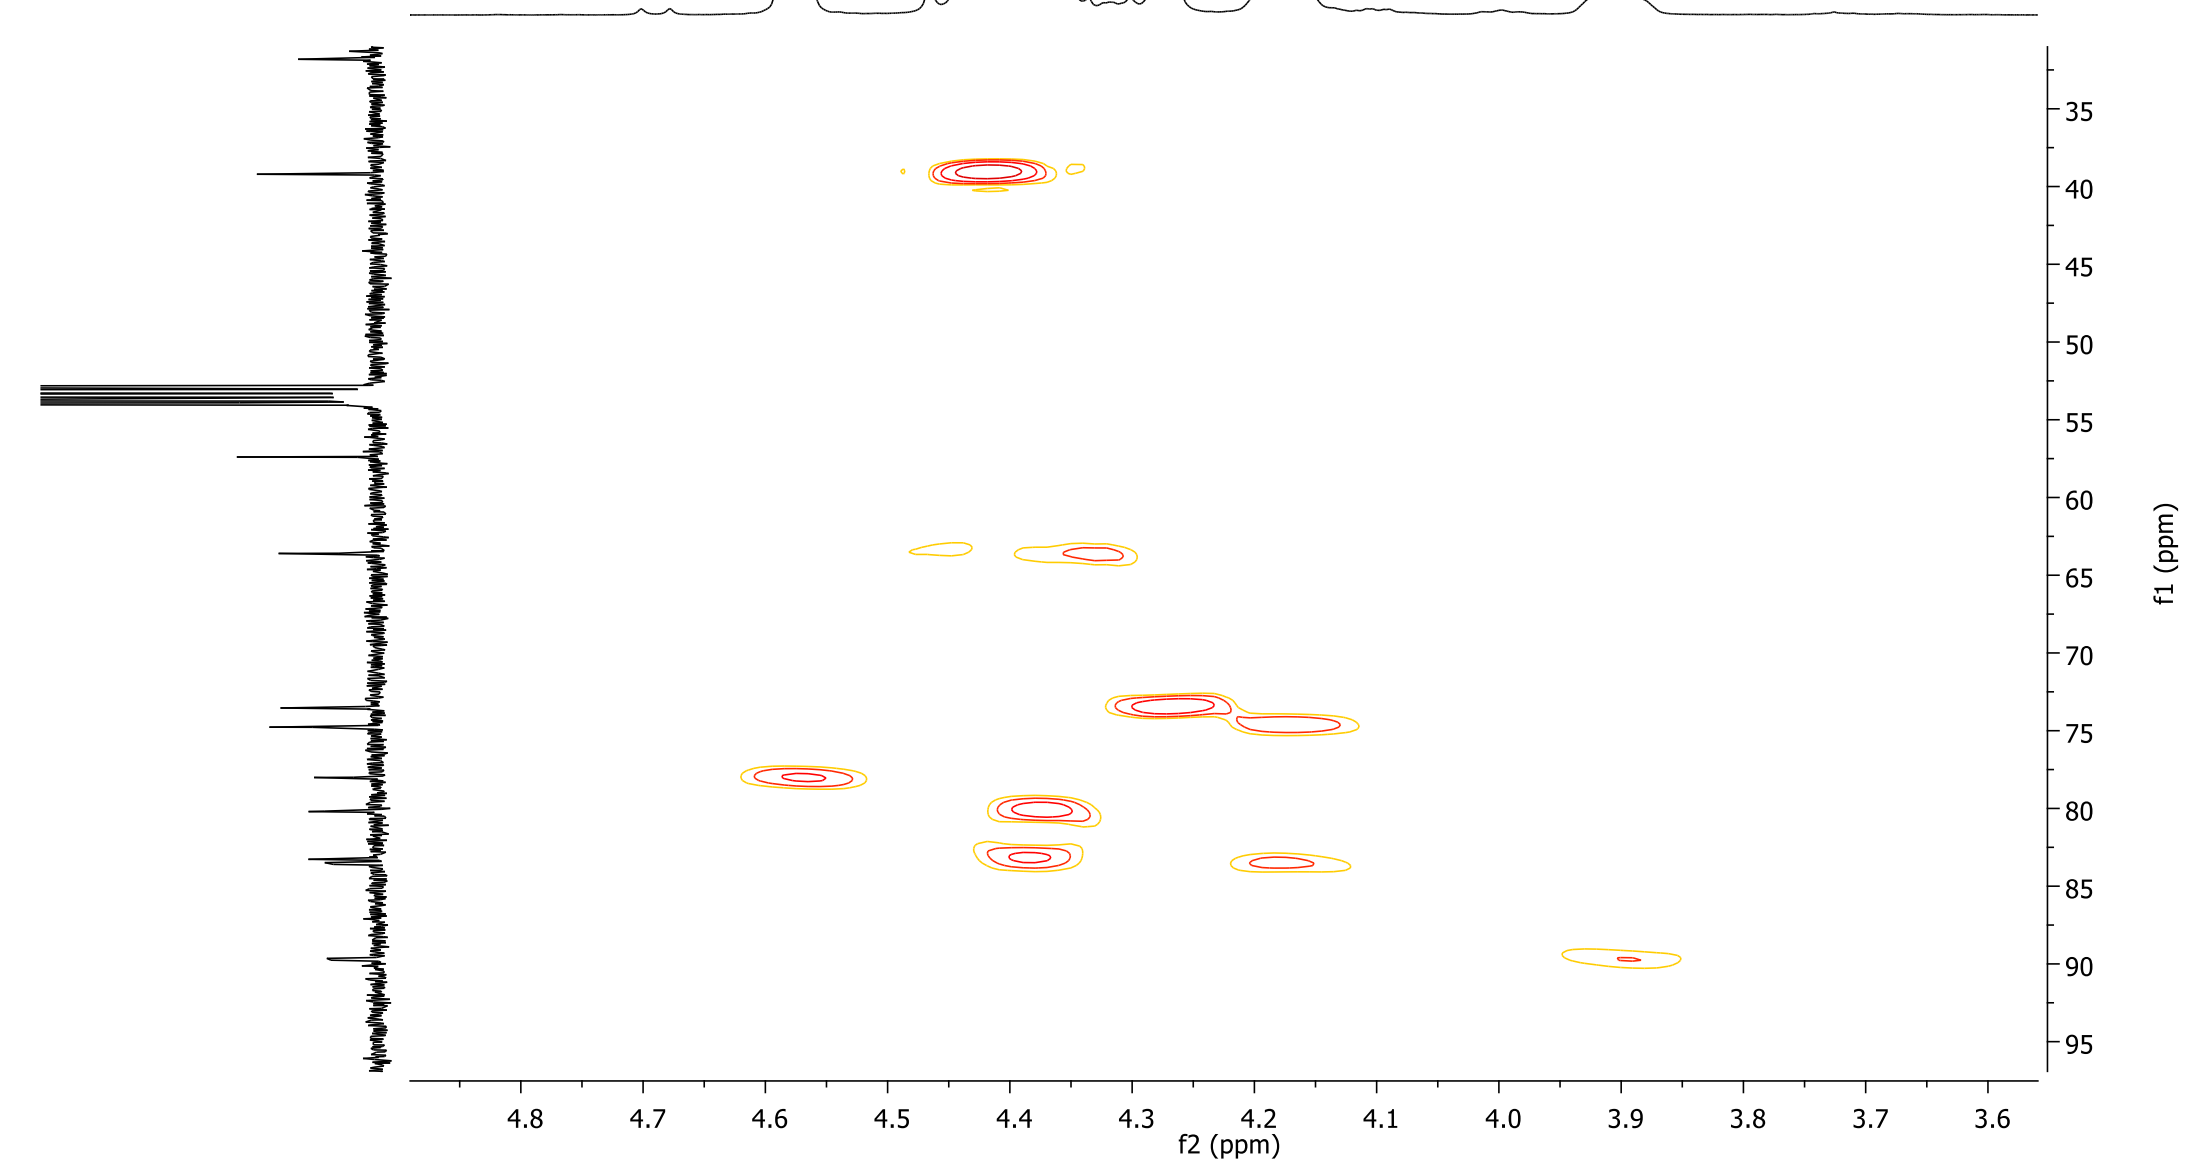

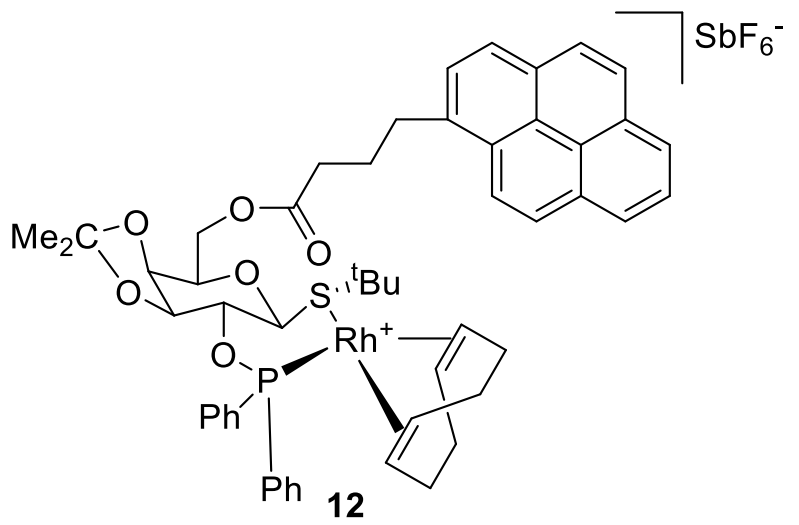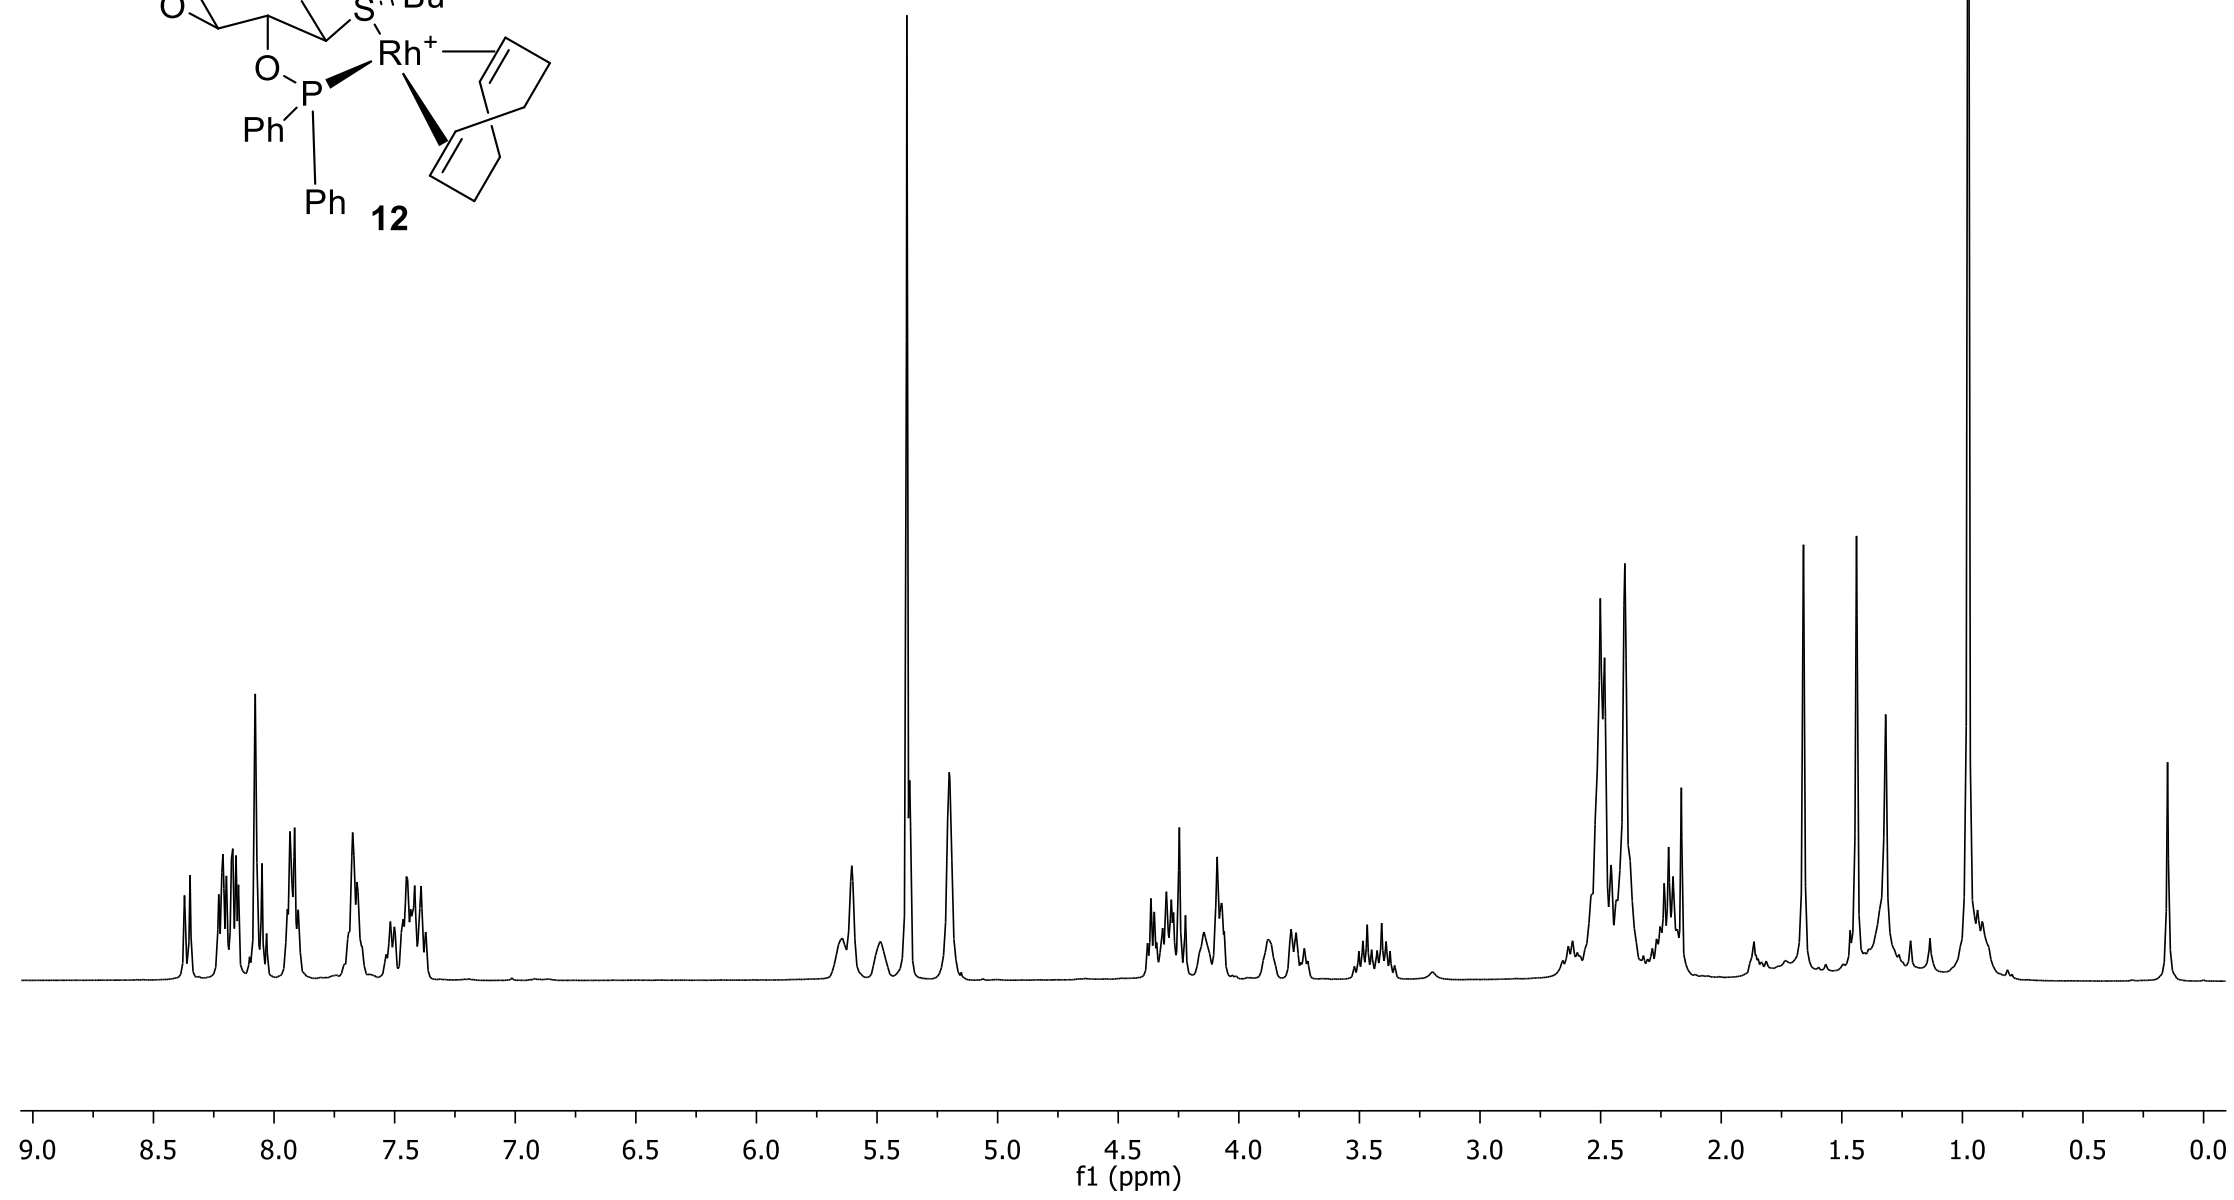

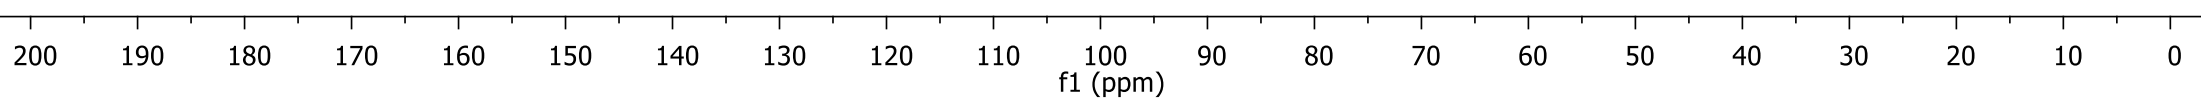

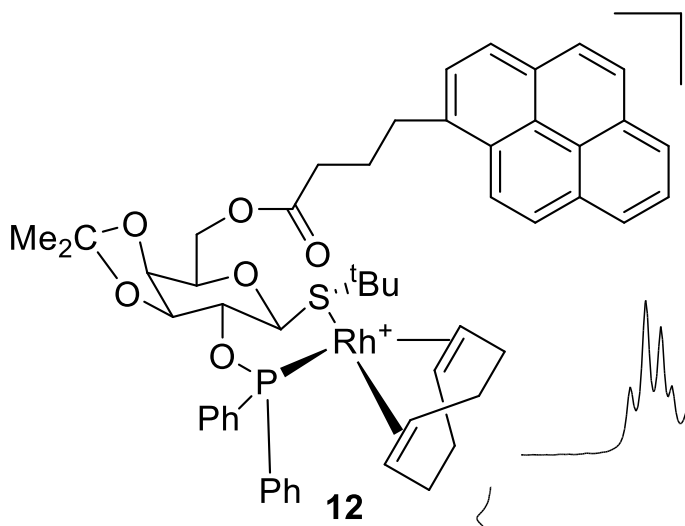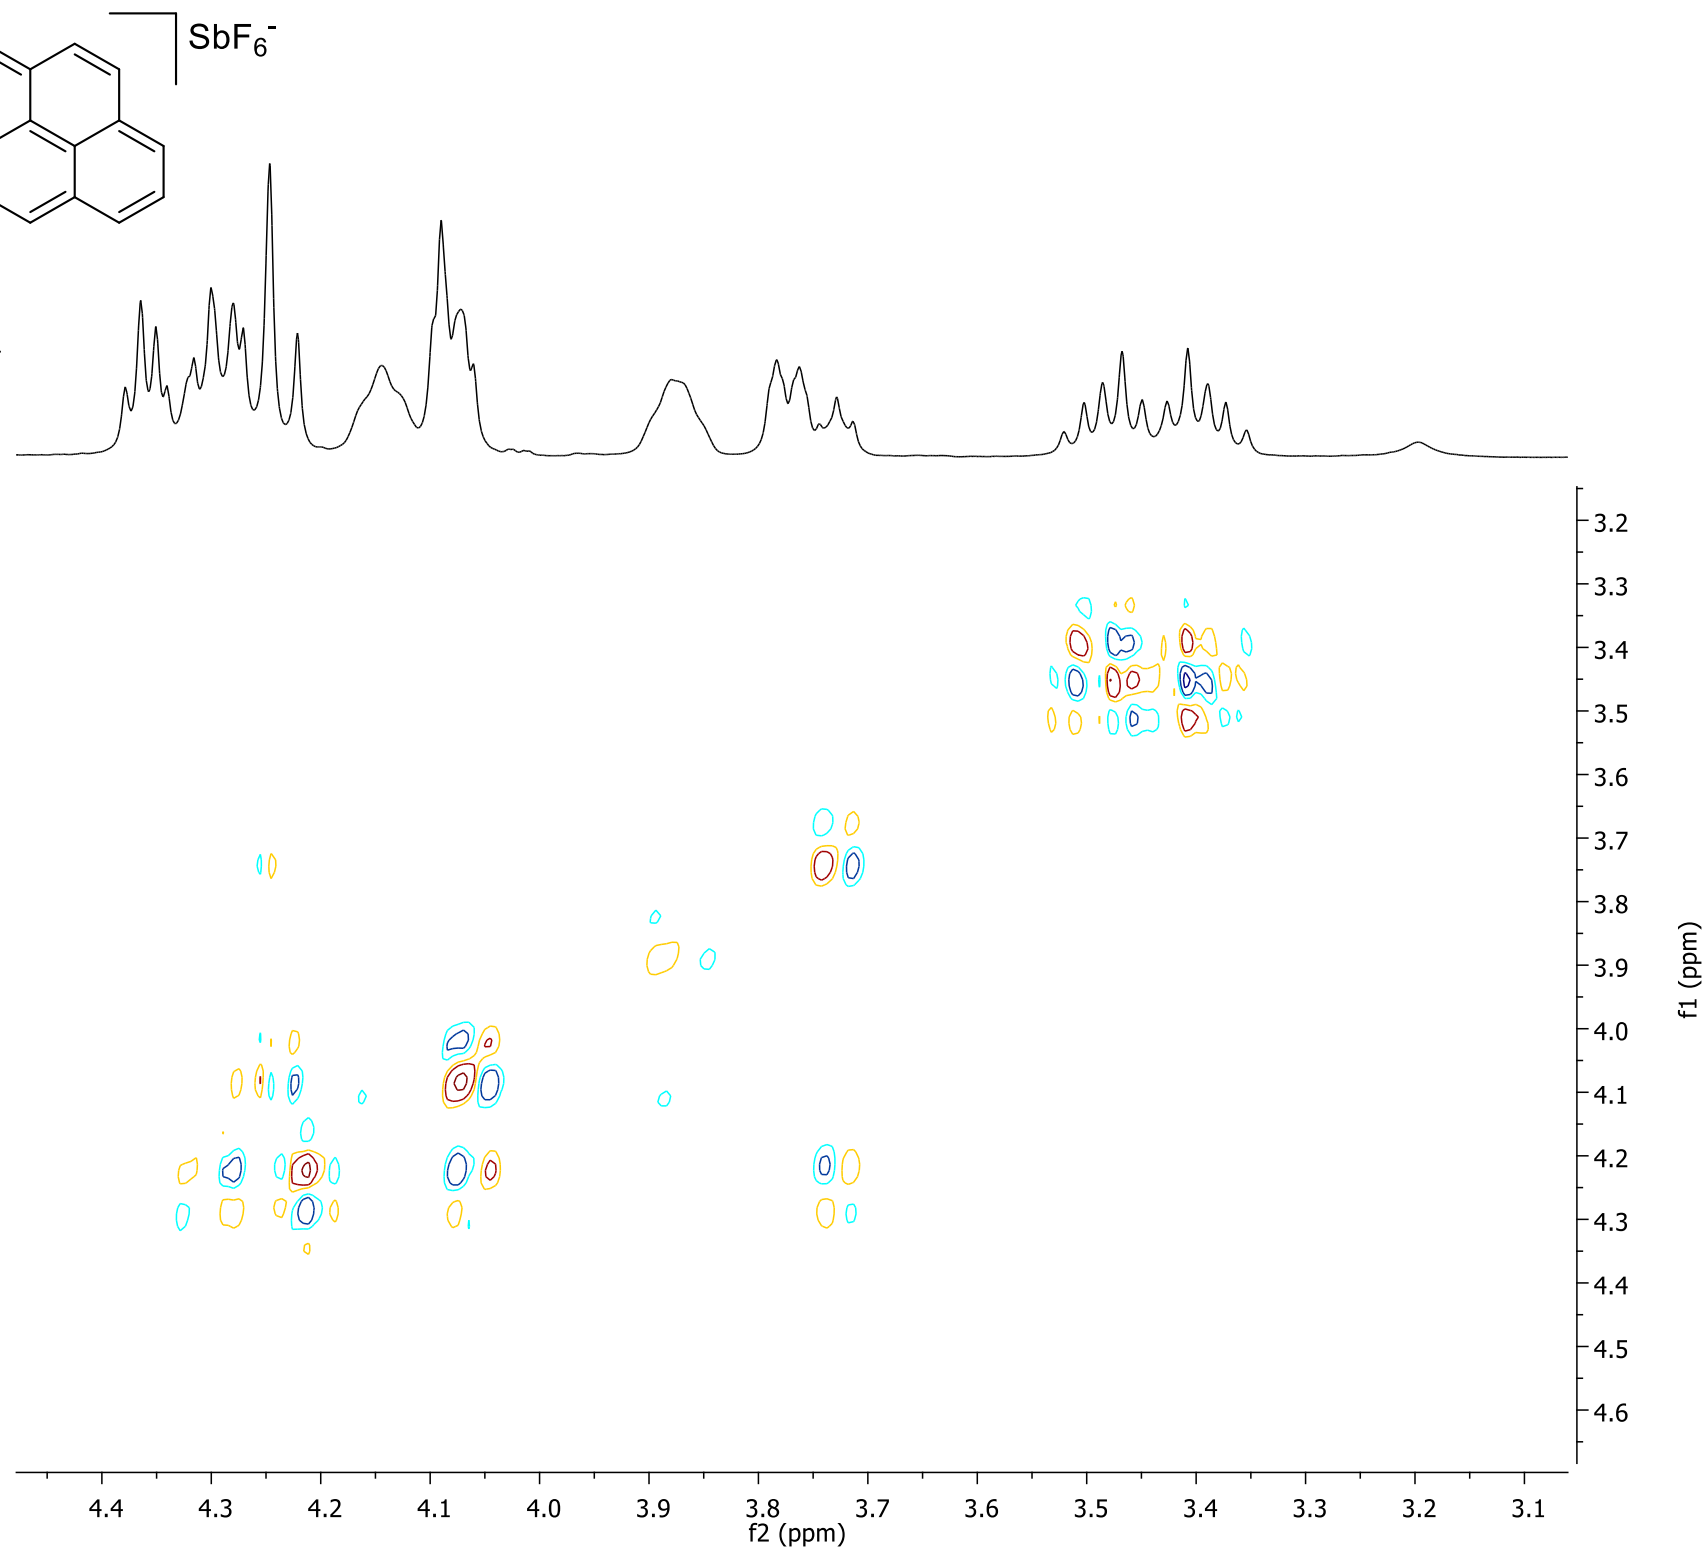

Supplement: c7ob01085k1.pdf [file c7ob01085k1.pdf]
